# Supplementary material for: A ribosome-associated chaperone enables substrate triage in a cotranslational protein targeting complex
Source: Nat Commun. 2020 Nov 17;11:5840. doi: 10.1038/s41467-020-19548-5 (PMC7673040; doi:10.1038/s41467-020-19548-5)
Supplement: Supplementary file 4 — Source Data [file 41467_2020_19548_MOESM4_ESM.xlsx]

## Sheet: Fig. 1c
radiography

## Sheet: Fig. 1d
[SRP] (nM)	pPL(WT) translocation ratio		[SR] (nM)	pPL(ss) translocation ratio	pPL(ssmt) translocation ratio	pPL(ssmt2) translocation ratio	pPL(wt) translocation ratio
0	0.16638		6.25	0.53949	0	0	0.97516
6.6	0.80433		12.5	0.5347	0	0	0.97501
13.2	0.85272		25	0.53214	0	0	0.98391
26.5	0.85704		50	0.54236	0	0	0.95995

## Sheet: Fig.2b
Figure	times(s)	31.25 nM SR	62.5 nM SR	125 nM SR	250 nM SR				Inset	[SR] (nM)	kobs (s-1)
	0.06	1	1	1	1					31.25	0.074115
	0.12	0.9964	0.99713	0.99425	0.98914					62.5	0.11476
	0.18	0.99361	0.99374	0.98859	0.98369					125	0.15925
	0.24	0.99198	0.99057	0.98391	0.97944					250	0.2298
	0.3	0.98853	0.98688	0.97965	0.97286
	0.36	0.98825	0.98396	0.98286	0.96559
	0.42	0.98716	0.97931	0.97708	0.9635
	0.48	0.98749	0.98035	0.9755	0.95898
	0.54	0.9835	0.97595	0.97003	0.95623
	0.6	0.98014	0.97267	0.96595	0.95029
	0.66	0.98041	0.9716	0.96212	0.94556
	0.72	0.98052	0.96782	0.95669	0.94479
	0.78	0.97681	0.96536	0.9555	0.939
	0.84	0.97986	0.96399	0.95299	0.93634
	0.9	0.97472	0.96104	0.94922	0.92909
	0.96	0.97631	0.95854	0.94422	0.93001
	1.02	0.97155	0.95557	0.94046	0.92396
	1.08	0.97253	0.95456	0.93985	0.92245
	1.14	0.97045	0.95248	0.93759	0.92023
	1.2	0.9685	0.95028	0.93218	0.9162
	1.26	0.96883	0.95051	0.93312	0.91178
	1.32	0.96632	0.94542	0.92922	0.90814
	1.38	0.96209	0.94153	0.92649	0.90414
	1.44	0.96372	0.9425	0.92402	0.9029
	1.5	0.96474	0.93969	0.92006	0.89923
	1.56	0.96523	0.9361	0.91819	0.89687
	1.62	0.96421	0.93556	0.91618	0.8944
	1.68	0.96214	0.93265	0.91428	0.88728
	1.74	0.96125	0.93307	0.91084	0.89059
	1.8	0.95695	0.92706	0.9094	0.88759
	1.86	0.95637	0.92783	0.90682	0.88255
	1.92	0.95926	0.92459	0.90521	0.88
	1.98	0.95301	0.92203	0.90269	0.87835
	2.04	0.95586	0.92406	0.90263	0.87344
	2.1	0.95505	0.92201	0.89624	0.8716
	2.16	0.95231	0.91848	0.89617	0.86886
	2.22	0.95165	0.91688	0.89531	0.86724
	2.28	0.95044	0.91836	0.89285	0.86195
	2.34	0.95116	0.9146	0.88954	0.8651
	2.4	0.94809	0.91286	0.88574	0.86125
	2.46	0.94793	0.91268	0.88617	0.85757
	2.52	0.94933	0.91021	0.88145	0.85457
	2.58	0.94418	0.90914	0.88408	0.85474
	2.64	0.94617	0.90617	0.88205	0.85369
	2.7	0.94325	0.90349	0.87552	0.8506
	2.76	0.94505	0.90296	0.87909	0.84772
	2.82	0.94413	0.90206	0.87288	0.84308
	2.88	0.9447	0.901	0.87226	0.84406
	2.94	0.93936	0.90037	0.87113	0.8403
	3	0.9409	0.89833	0.87023	0.84118
	3.06	0.93926	0.89672	0.86849	0.83693
	3.12	0.93878	0.89549	0.86467	0.83371
	3.18	0.93792	0.89212	0.86607	0.83358
	3.24	0.93882	0.88845	0.86229	0.83315
	3.3	0.93473	0.89026	0.86342	0.82926
	3.36	0.93525	0.88786	0.85731	0.83062
	3.42	0.9335	0.8874	0.85458	0.82644
	3.48	0.93488	0.8851	0.85431	0.82569
	3.54	0.93322	0.8835	0.85602	0.82549
	3.6	0.93374	0.87887	0.85427	0.82089
	3.66	0.93269	0.88131	0.84869	0.82099
	3.72	0.93382	0.88224	0.84939	0.81788
	3.78	0.92993	0.87816	0.8474	0.81792
	3.84	0.92841	0.87773	0.84438	0.81618
	3.9	0.92914	0.87599	0.84098	0.81241
	3.96	0.92857	0.87574	0.84111	0.81142
	4.02	0.92748	0.87624	0.83993	0.80978
	4.08	0.92678	0.8733	0.83756	0.80849
	4.14	0.92593	0.87352	0.83854	0.808
	4.2	0.92422	0.87061	0.83917	0.80527
	4.26	0.92554	0.86667	0.8371	0.80107
	4.32	0.92459	0.86794	0.83419	0.802
	4.38	0.92236	0.86537	0.83442	0.80145
	4.44	0.92342	0.86523	0.83295	0.79888
	4.5	0.92299	0.86183	0.83264	0.79761
	4.56	0.9209	0.86177	0.82791	0.79432
	4.62	0.91895	0.86104	0.82569	0.79424
	4.68	0.91978	0.86168	0.82549	0.79212
	4.74	0.91969	0.85903	0.82392	0.79033
	4.8	0.91949	0.85839	0.82388	0.79274
	4.86	0.91912	0.85619	0.82339	0.78799
	4.92	0.92103	0.85271	0.8208	0.79143
	4.98	0.91527	0.8559	0.81978	0.78973
	5.04	0.91505	0.85341	0.81825	0.78729
	5.1	0.91708	0.85243	0.81754	0.78509
	5.16	0.91604	0.85425	0.81622	0.78217
	5.22	0.91314	0.85206	0.81251	0.78464
	5.28	0.91314	0.85035	0.81509	0.78252
	5.34	0.90825	0.84713	0.8122	0.78151
	5.4	0.9106	0.8478	0.81034	0.77801
	5.46	0.9081	0.84685	0.80843	0.77576
	5.52	0.90866	0.84194	0.80946	0.7758
	5.58	0.90898	0.8416	0.80685	0.77521
	5.64	0.90976	0.84108	0.80778	0.77591
	5.7	0.91039	0.8431	0.80488	0.77306
	5.76	0.90863	0.84201	0.80528	0.77476
	5.82	0.90362	0.84148	0.80236	0.77159
	5.88	0.90826	0.83874	0.80416	0.76861
	5.94	0.90638	0.83793	0.80257	0.76732
	6	0.90493	0.83637	0.80167	0.76786
	6.06	0.90591	0.83543	0.79953	0.76709
	6.12	0.90436	0.83537	0.79815	0.76286
	6.18	0.90302	0.83249	0.79434	0.76439
	6.24	0.9017	0.8343	0.79797	0.76552
	6.3	0.90251	0.83301	0.79353	0.76173
	6.36	0.90087	0.83098	0.79401	0.76396
	6.42	0.90083	0.83055	0.79299	0.75951
	6.48	0.89893	0.83102	0.79061	0.76142
	6.54	0.89837	0.82686	0.79145	0.75862
	6.6	0.89955	0.82665	0.79015	0.75919
	6.66	0.89914	0.82759	0.7887	0.75611
	6.72	0.89892	0.82597	0.78818	0.75524
	6.78	0.89746	0.82377	0.78586	0.75673
	6.84	0.89825	0.82467	0.7877	0.75533
	6.9	0.89915	0.82025	0.78526	0.75401
	6.96	0.89556	0.82305	0.78377	0.75284
	7.02	0.89669	0.82355	0.78429	0.75217
	7.08	0.8953	0.82044	0.78408	0.74981
	7.14	0.89375	0.82054	0.77802	0.7501
	7.2	0.89377	0.81775	0.78059	0.75146
	7.26	0.89291	0.81826	0.77846	0.7497
	7.32	0.89254	0.81732	0.77681	0.74732
	7.38	0.89284	0.81703	0.77706	0.7492
	7.44	0.89066	0.81741	0.77721	0.74806
	7.5	0.89218	0.81669	0.7764	0.74222
	7.56	0.8906	0.81608	0.77557	0.74686
	7.62	0.89011	0.81288	0.77353	0.74143
	7.68	0.89119	0.81292	0.77442	0.74274
	7.74	0.88807	0.81219	0.77265	0.74251
	7.8	0.88704	0.80826	0.772	0.743
	7.86	0.88777	0.80976	0.77044	0.7394
	7.92	0.88792	0.80989	0.77027	0.73865
	7.98	0.88354	0.80881	0.76899	0.7371
	8.04	0.88672	0.8073	0.76875	0.73677
	8.1	0.88631	0.80598	0.76854	0.73563
	8.16	0.88877	0.80603	0.76925	0.73536
	8.22	0.88586	0.80626	0.76557	0.73498
	8.28	0.88538	0.80512	0.76587	0.73497
	8.34	0.8835	0.80221	0.76216	0.73452
	8.4	0.88257	0.80192	0.76512	0.73205
	8.46	0.88106	0.80248	0.7629	0.73474
	8.52	0.88203	0.80086	0.76161	0.73236
	8.58	0.88294	0.80279	0.75887	0.73213
	8.64	0.88014	0.80212	0.76112	0.73306
	8.7	0.8839	0.80103	0.76165	0.73123
	8.76	0.88076	0.79914	0.76236	0.73025
	8.82	0.88085	0.79647	0.7572	0.72763
	8.88	0.88146	0.79409	0.75883	0.72757
	8.94	0.88096	0.79596	0.75827	0.72958
	9	0.8793	0.79759	0.75804	0.72941
	9.06	0.87654	0.79652	0.75414	0.72677
	9.12	0.87871	0.79307	0.75598	0.72459
	9.18	0.87721	0.79375	0.75552	0.72641
	9.24	0.87577	0.79338	0.75358	0.72393
	9.3	0.87523	0.79175	0.75592	0.72543
	9.36	0.873	0.79399	0.75237	0.72465
	9.42	0.87399	0.79306	0.75274	0.72579
	9.48	0.87729	0.79134	0.75132	0.72277
	9.54	0.873	0.79144	0.75072	0.72087
	9.6	0.87004	0.78998	0.75159	0.72034
	9.66	0.87356	0.78876	0.74972	0.72093
	9.72	0.86955	0.78637	0.74946	0.72209
	9.78	0.87265	0.78935	0.74876	0.71923
	9.84	0.87411	0.78654	0.74683	0.71726
	9.9	0.87076	0.78677	0.74804	0.71874
	9.96	0.87123	0.78584	0.7492	0.71773
	10.02	0.87079	0.78413	0.74663	0.71783
	10.08	0.86903	0.78323	0.74483	0.71482
	10.14	0.87138	0.78282	0.74416	0.71824
	10.2	0.86621	0.78538	0.74516	0.71584
	10.26	0.8684	0.78177	0.74135	0.71633
	10.32	0.86685	0.78025	0.74297	0.71387
	10.38	0.86589	0.78195	0.74064	0.71439
	10.44	0.86849	0.77903	0.74182	0.71133
	10.5	0.86579	0.77967	0.74026	0.71334
	10.56	0.86698	0.77993	0.73905	0.71098
	10.62	0.8625	0.77814	0.73835	0.71207
	10.68	0.86807	0.77877	0.73822	0.71061
	10.74	0.86458	0.77664	0.74235	0.70895
	10.8	0.86669	0.77737	0.74118	0.70725
	10.86	0.86619	0.77817	0.73774	0.70948
	10.92	0.86586	0.77782	0.73854	0.70942
	10.98	0.86404	0.7751	0.73496	0.7067
	11.04	0.863	0.77796	0.73666	0.71013
	11.1	0.86428	0.77212	0.73258	0.70866
	11.16	0.86371	0.77076	0.7345	0.70844
	11.22	0.86353	0.77466	0.7357	0.70582
	11.28	0.86067	0.77221	0.73532	0.70674
	11.34	0.86316	0.77178	0.73418	0.7073
	11.4	0.86107	0.77196	0.73379	0.70558
	11.46	0.86021	0.76902	0.73312	0.70575
	11.52	0.85917	0.77243	0.73351	0.70587
	11.58	0.86026	0.76976	0.7314	0.70521
	11.64	0.8595	0.77245	0.73285	0.70147
	11.7	0.86066	0.76991	0.72984	0.70282
	11.76	0.85943	0.76995	0.73154	0.70015
	11.82	0.85736	0.7674	0.72966	0.70302
	11.88	0.85794	0.76743	0.72673	0.69958
	11.94	0.85925	0.76614	0.72856	0.70104
	12	0.85532	0.76883	0.72898	0.70072
	12.06	0.85552	0.76721	0.73041	0.70149
	12.12	0.85765	0.76618	0.72968	0.70407
	12.18	0.85695	0.76283	0.72739	0.70016
	12.24	0.85423	0.76644	0.72576	0.69925
	12.3	0.85422	0.76305	0.72813	0.70021
	12.36	0.85681	0.76309	0.72346	0.69856
	12.42	0.85394	0.76169	0.72561	0.69833
	12.48	0.85606	0.76257	0.72404	0.69951
	12.54	0.85324	0.76186	0.72416	0.69722
	12.6	0.85195	0.76183	0.72373	0.69767
	12.66	0.85408	0.76216	0.72203	0.69698
	12.72	0.85714	0.76082	0.72154	0.69458
	12.78	0.85311	0.76014	0.72098	0.69676
	12.84	0.85257	0.76233	0.721	0.69613
	12.9	0.85393	0.75862	0.72205	0.69666
	12.96	0.85259	0.75888	0.72372	0.69701
	13.02	0.85098	0.75845	0.72123	0.69601
	13.08	0.85293	0.76003	0.71842	0.69518
	13.14	0.84831	0.75711	0.72392	0.69323
	13.2	0.85115	0.75756	0.71983	0.6966
	13.26	0.84877	0.75722	0.72021	0.69078
	13.32	0.84994	0.75705	0.71998	0.69313
	13.38	0.8508	0.75438	0.72082	0.69265
	13.44	0.84838	0.7564	0.71912	0.69291
	13.5	0.85226	0.75421	0.71786	0.69083
	13.56	0.84773	0.75483	0.71688	0.69109
	13.62	0.84745	0.75312	0.71605	0.69123
	13.68	0.84801	0.75445	0.7165	0.69126
	13.74	0.84621	0.75277	0.71673	0.69129
	13.8	0.84709	0.75181	0.71745	0.68985
	13.86	0.84466	0.75214	0.71497	0.69053
	13.92	0.84584	0.75557	0.7132	0.69041
	13.98	0.84574	0.75073	0.71221	0.68902
	14.04	0.84662	0.75056	0.71457	0.69127
	14.1	0.84582	0.75014	0.71524	0.69021
	14.16	0.8458	0.74902	0.71274	0.68869
	14.22	0.84489	0.74936	0.71467	0.68844
	14.28	0.84639	0.74992	0.7135	0.68714
	14.34	0.84002	0.74873	0.71208	0.6891
	14.4	0.8439	0.7461	0.71029	0.68569
	14.46	0.84172	0.74927	0.71157	0.68343
	14.52	0.83993	0.75088	0.71214	0.68795
	14.58	0.8411	0.74818	0.71082	0.68582
	14.64	0.8409	0.74569	0.71005	0.68563
	14.7	0.84401	0.74659	0.70955	0.68436
	14.76	0.84021	0.74763	0.71122	0.68478
	14.82	0.8435	0.7473	0.70827	0.68508
	14.88	0.84216	0.74597	0.70886	0.68361
	14.94	0.84253	0.74522	0.70876	0.68462
	15	0.83982	0.74541	0.70665	0.68515
	15.06	0.84139	0.7456	0.70972	0.68256
	15.12	0.84026	0.74474	0.70833	0.68251
	15.18	0.84026	0.74619	0.70512	0.68539
	15.24	0.84077	0.74501	0.70659	0.68231
	15.3	0.83919	0.74491	0.70688	0.68643
	15.36	0.83773	0.7433	0.70599	0.68288
	15.42	0.83758	0.74373	0.70639	0.68469
	15.48	0.83684	0.74175	0.70433	0.68384
	15.54	0.83614	0.74109	0.70508	0.68066
	15.6	0.83647	0.74253	0.70438	0.68215
	15.66	0.83952	0.74072	0.70583	0.6788
	15.72	0.83479	0.73948	0.70501	0.68201
	15.78	0.8346	0.74082	0.70545	0.6812
	15.84	0.83374	0.7399	0.70304	0.68102
	15.9	0.83488	0.7393	0.70218	0.68063
	15.96	0.83596	0.73901	0.70319	0.67969
	16.02	0.83295	0.73794	0.70219	0.67805
	16.08	0.8326	0.73617	0.70187	0.67916
	16.14	0.83122	0.73697	0.70333	0.68024
	16.2	0.83264	0.73678	0.70307	0.67946
	16.26	0.83472	0.737	0.70199	0.67846
	16.32	0.83192	0.73663	0.7024	0.67951
	16.38	0.83387	0.73657	0.70105	0.67696
	16.44	0.83343	0.73598	0.70038	0.67809
	16.5	0.83538	0.73358	0.70067	0.67609
	16.56	0.83128	0.73446	0.7018	0.6779
	16.62	0.83549	0.73443	0.69779	0.67618
	16.68	0.83468	0.73396	0.69843	0.6769
	16.74	0.83277	0.73238	0.6991	0.67819
	16.8	0.82972	0.73172	0.70064	0.67516
	16.86	0.83018	0.7321	0.69717	0.6764
	16.92	0.82954	0.73269	0.69844	0.67504
	16.98	0.82893	0.73401	0.6975	0.6776
	17.04	0.83027	0.7341	0.69982	0.67577
	17.1	0.82957	0.72988	0.69821	0.67635
	17.16	0.83267	0.73197	0.69656	0.67394
	17.22	0.8289	0.73118	0.69511	0.67295
	17.28	0.83241	0.73075	0.69941	0.67412
	17.34	0.82893	0.73197	0.69704	0.67461
	17.4	0.82699	0.72847	0.69554	0.67305
	17.46	0.82687	0.73106	0.69698	0.67215
	17.52	0.83175	0.72774	0.6977	0.67412
	17.58	0.82771	0.72573	0.69506	0.67473
	17.64	0.829	0.72878	0.69577	0.67593
	17.7	0.82685	0.72643	0.69429	0.6764
	17.76	0.827	0.72669	0.69431	0.67333
	17.82	0.82495	0.72677	0.69506	0.67394
	17.88	0.82739	0.72859	0.6914	0.67055
	17.94	0.82956	0.72544	0.69773	0.67284
	18	0.82799	0.72724	0.69272	0.67132
	18.06	0.82757	0.72605	0.69637	0.67169
	18.12	0.82949	0.72563	0.69347	0.67257
	18.18	0.82821	0.7253	0.6914	0.67033
	18.24	0.82788	0.72448	0.69334	0.67096
	18.3	0.82829	0.72543	0.69237	0.67146
	18.36	0.82645	0.72419	0.69254	0.67199
	18.42	0.82536	0.72164	0.69064	0.67048
	18.48	0.82787	0.725	0.69003	0.6693
	18.54	0.82667	0.72433	0.68956	0.67006
	18.6	0.82189	0.72254	0.69107	0.67307
	18.66	0.82648	0.72555	0.69212	0.66694
	18.72	0.82246	0.7232	0.69111	0.66881
	18.78	0.8251	0.72267	0.68841	0.6698
	18.84	0.82365	0.72137	0.68895	0.67204
	18.9	0.82658	0.72277	0.69021	0.67003
	18.96	0.82607	0.72397	0.69003	0.66754
	19.02	0.82342	0.72343	0.68874	0.67037
	19.08	0.82364	0.71998	0.68791	0.66943
	19.14	0.82341	0.7207	0.68781	0.66616
	19.2	0.82387	0.72014	0.68794	0.66844
	19.26	0.82366	0.71939	0.68731	0.66876
	19.32	0.82325	0.72097	0.68825	0.66759
	19.38	0.8247	0.72027	0.68638	0.66941
	19.44	0.82389	0.72005	0.69147	0.66573
	19.5	0.82277	0.71685	0.6853	0.6649
	19.56	0.82476	0.71743	0.68919	0.66726
	19.62	0.822	0.71904	0.68657	0.66688
	19.68	0.82152	0.71929	0.68879	0.66797
	19.74	0.82192	0.71763	0.68582	0.66596
	19.8	0.81995	0.71835	0.68747	0.66645
	19.86	0.82198	0.71761	0.68688	0.66643
	19.92	0.82078	0.71839	0.68388	0.66537
	19.98	0.82146	0.71751	0.68744	0.66693
	20.04	0.82179	0.71784	0.68565	0.66667
	20.1	0.81878	0.71768	0.68629	0.66589
	20.16	0.82058	0.71536	0.68334	0.66476
	20.22	0.81871	0.71568	0.68577	0.6644
	20.28	0.81746	0.71545	0.68323	0.66446
	20.34	0.81977	0.71381	0.68308	0.66611
	20.4	0.82025	0.71431	0.68465	0.66589
	20.46	0.81949	0.71453	0.6836	0.66431
	20.52	0.81779	0.71429	0.68351	0.66546
	20.58	0.81782	0.71426	0.68457	0.66486
	20.64	0.81962	0.71549	0.68555	0.66387
	20.7	0.81794	0.71258	0.68243	0.66331
	20.76	0.81968	0.71367	0.68174	0.6654
	20.82	0.81739	0.71379	0.68355	0.6626
	20.88	0.81854	0.71212	0.6841	0.66382
	20.94	0.81497	0.71359	0.68119	0.66304
	21	0.81635	0.71164	0.68364	0.66394
	21.06	0.81842	0.7138	0.68168	0.66412
	21.12	0.81554	0.71056	0.68155	0.66144
	21.18	0.81676	0.71164	0.68191	0.66185
	21.24	0.81608	0.71088	0.67983	0.66207
	21.3	0.81687	0.70968	0.67972	0.66213
	21.36	0.81585	0.71042	0.68321	0.66131
	21.42	0.81548	0.71095	0.6816	0.66277
	21.48	0.81468	0.71219	0.68044	0.66235
	21.54	0.81667	0.71019	0.68203	0.66056
	21.6	0.81352	0.70857	0.67879	0.66117
	21.66	0.81493	0.71221	0.68211	0.66169
	21.72	0.81364	0.7096	0.67825	0.6601
	21.78	0.81361	0.7096	0.67902	0.66012
	21.84	0.8141	0.7074	0.6795	0.66061
	21.9	0.81439	0.70927	0.68018	0.66269
	21.96	0.81439	0.71032	0.67809	0.66158
	22.02	0.81488	0.70702	0.68212	0.66272
	22.08	0.81277	0.70948	0.68104	0.66117
	22.14	0.8141	0.7078	0.67699	0.66234
	22.2	0.8146	0.70754	0.6776	0.6631
	22.26	0.81037	0.70966	0.67778	0.66124
	22.32	0.81059	0.7067	0.67724	0.65926
	22.38	0.81228	0.70713	0.67744	0.66133
	22.44	0.8115	0.70878	0.6782	0.66492
	22.5	0.81132	0.70757	0.67857	0.66052
	22.56	0.81097	0.70511	0.67874	0.66136
	22.62	0.81019	0.70562	0.67663	0.65753
	22.68	0.80886	0.70573	0.67878	0.6598
	22.74	0.81247	0.70382	0.67612	0.66122
	22.8	0.81055	0.70695	0.67566	0.66048
	22.86	0.8119	0.70429	0.67742	0.65773
	22.92	0.80911	0.70576	0.67672	0.65789
	22.98	0.80955	0.70411	0.67543	0.6598
	23.04	0.8114	0.70444	0.67707	0.65957
	23.1	0.80999	0.70455	0.67733	0.65858
	23.16	0.80936	0.70022	0.6784	0.66007
	23.22	0.80945	0.70278	0.67741	0.65797
	23.28	0.80848	0.7028	0.6746	0.65743
	23.34	0.80718	0.70348	0.67444	0.65858
	23.4	0.80565	0.70537	0.67338	0.65817
	23.46	0.80877	0.70505	0.67431	0.65979
	23.52	0.80815	0.70226	0.67545	0.65717
	23.58	0.80896	0.70379	0.67388	0.65979
	23.64	0.80714	0.70152	0.67413	0.65843
	23.7	0.80754	0.70107	0.67276	0.65625
	23.76	0.80773	0.7011	0.67724	0.6584
	23.82	0.80677	0.70334	0.67261	0.65723
	23.88	0.8093	0.70205	0.67485	0.65706
	23.94	0.80874	0.7034	0.67338	0.65739
	24	0.80664	0.70266	0.67559	0.65767
	24.06	0.80463	0.6992	0.67268	0.65517
	24.12	0.8062	0.70109	0.67436	0.65813
	24.18	0.80684	0.70274	0.67447	0.65674
	24.24	0.80544	0.70182	0.67422	0.6567
	24.3	0.8082	0.70138	0.67314	0.65642
	24.36	0.80632	0.70087	0.67451	0.65858
	24.42	0.80652	0.70142	0.67323	0.65752
	24.48	0.80627	0.69877	0.67302	0.65739
	24.54	0.80489	0.69873	0.67223	0.65436
	24.6	0.80241	0.69852	0.67086	0.65635
	24.66	0.80608	0.69858	0.67277	0.65516
	24.72	0.80659	0.69918	0.67258	0.65648
	24.78	0.8057	0.69794	0.67113	0.65615
	24.84	0.80763	0.69878	0.67222	0.65481
	24.9	0.80477	0.69676	0.67002	0.65583
	24.96	0.80614	0.69908	0.67186	0.65738
	25.02	0.80525	0.69654	0.67124	0.65275
	25.08	0.80524	0.69671	0.67144	0.65423
	25.14	0.80711	0.69652	0.67084	0.65404
	25.2	0.80677	0.6972	0.67138	0.65504
	25.26	0.8043	0.69757	0.67323	0.65519
	25.32	0.8065	0.6981	0.67012	0.65438
	25.38	0.80104	0.69983	0.67144	0.65812
	25.44	0.80652	0.69549	0.67039	0.65459
	25.5	0.80301	0.69416	0.67065	0.65569
	25.56	0.80392	0.69605	0.67122	0.65677
	25.62	0.80253	0.696	0.67144	0.65336
	25.68	0.80306	0.69629	0.67009	0.6531
	25.74	0.8012	0.69501	0.67039	0.65585
	25.8	0.80327	0.69572	0.67205	0.65354
	25.86	0.802	0.69442	0.66921	0.65484
	25.92	0.80159	0.69577	0.67187	0.65357
	25.98	0.80092	0.69394	0.67028	0.653
	26.04	0.80014	0.69291	0.6721	0.65254
	26.1	0.80046	0.69717	0.66766	0.65062
	26.16	0.80221	0.69653	0.66749	0.65422
	26.22	0.79879	0.69522	0.66964	0.65183
	26.28	0.80266	0.69462	0.6714	0.65173
	26.34	0.79895	0.69135	0.66976	0.65169
	26.4	0.80033	0.69249	0.66718	0.65243
	26.46	0.80095	0.6935	0.66816	0.65329
	26.52	0.80086	0.69321	0.66841	0.6519
	26.58	0.79996	0.69472	0.66724	0.65278
	26.64	0.80163	0.6946	0.6673	0.65547
	26.7	0.79885	0.69546	0.6679	0.65223
	26.76	0.80185	0.69372	0.66711	0.65443
	26.82	0.80014	0.69189	0.66769	0.65166
	26.88	0.79707	0.6935	0.66841	0.65172
	26.94	0.79776	0.69195	0.66439	0.6506
	27	0.80205	0.69441	0.66974	0.65195
	27.06	0.7982	0.6913	0.66582	0.65186
	27.12	0.79932	0.69112	0.66807	0.65152
	27.18	0.7982	0.692	0.66786	0.65128
	27.24	0.7982	0.68865	0.66506	0.65137
	27.3	0.79664	0.69068	0.66624	0.65152
	27.36	0.79748	0.69119	0.6653	0.64968
	27.42	0.80038	0.6888	0.66702	0.6529
	27.48	0.79797	0.68736	0.66597	0.649
	27.54	0.79783	0.69013	0.6663	0.65009
	27.6	0.79763	0.69055	0.66518	0.65065
	27.66	0.79789	0.6907	0.66703	0.65208
	27.72	0.79601	0.69074	0.66617	0.65165
	27.78	0.79529	0.69088	0.66574	0.65467
	27.84	0.79739	0.68988	0.66457	0.65067
	27.9	0.7956	0.6897	0.66563	0.6512
	27.96	0.79484	0.68774	0.66639	0.65197
	28.02	0.79823	0.68954	0.66566	0.64931
	28.08	0.79587	0.68994	0.66518	0.65177
	28.14	0.79213	0.69072	0.6673	0.65095
	28.2	0.79647	0.68728	0.66586	0.65019
	28.26	0.79542	0.68671	0.66499	0.65009
	28.32	0.79612	0.68983	0.66415	0.64734
	28.38	0.79641	0.68962	0.66499	0.6509
	28.44	0.79458	0.68828	0.6628	0.64834
	28.5	0.79673	0.68818	0.66438	0.65105
	28.56	0.79365	0.69097	0.66557	0.64939
	28.62	0.79412	0.68607	0.66714	0.64997
	28.68	0.79344	0.68601	0.6649	0.64915
	28.74	0.79303	0.68765	0.66702	0.64947
	28.8	0.79237	0.68659	0.66317	0.65252
	28.86	0.7923	0.68672	0.66578	0.64945
	28.92	0.79088	0.68734	0.66154	0.64925
	28.98	0.79366	0.68741	0.66402	0.64917
	29.04	0.79205	0.6846	0.66105	0.64759
	29.1	0.79485	0.68752	0.66317	0.64698
	29.16	0.79278	0.68617	0.66277	0.65162
	29.22	0.79213	0.68404	0.664	0.65062
	29.28	0.79089	0.68519	0.66304	0.64884
	29.34	0.79145	0.68509	0.66339	0.65044
	29.4	0.79024	0.68644	0.66382	0.6498
	29.46	0.79194	0.68742	0.66236	0.64823
	29.52	0.79317	0.68701	0.66034	0.65016
	29.58	0.79024	0.68315	0.6626	0.64728
	29.64	0.78999	0.68215	0.66226	0.64761
	29.7	0.79134	0.68505	0.66286	0.6489
	29.76	0.79243	0.68154	0.66253	0.65066
	29.82	0.79196	0.68339	0.66267	0.64647
	29.88	0.78964	0.68595	0.6621	0.64909
	29.94	0.78869	0.68278	0.66238	0.64771
	30	0.78999	0.68488	0.66256	0.64461
	30.06	0.79145	0.68582	0.66029	0.64792
	30.12	0.78889	0.68577	0.66126	0.64973
	30.18	0.78875	0.68434	0.66259	0.64716
	30.24	0.78794	0.68328	0.66364	0.64772
	30.3	0.78733	0.68454	0.66179	0.64708
	30.36	0.78944	0.68514	0.65924	0.64833
	30.42	0.78906	0.68614	0.6598	0.64904
	30.48	0.79028	0.68258	0.65997	0.64768
	30.54	0.78881	0.68308	0.65811	0.64822
	30.6	0.78803	0.68129	0.65971	0.64889
	30.66	0.7858	0.68298	0.65938	0.64698
	30.72	0.78736	0.68245	0.66122	0.64897
	30.78	0.78616	0.6831	0.66112	0.64612
	30.84	0.78914	0.68422	0.65983	0.64572
	30.9	0.78614	0.681	0.66087	0.64741
	30.96	0.78991	0.68141	0.66079	0.64615
	31.02	0.78842	0.68123	0.66104	0.64688
	31.08	0.78756	0.68386	0.65915	0.6488
	31.14	0.78718	0.68052	0.66003	0.64684
	31.2	0.78638	0.68059	0.6607	0.64714
	31.26	0.78447	0.68306	0.65985	0.6461
	31.32	0.78471	0.68085	0.65753	0.64498
	31.38	0.78544	0.68003	0.66117	0.64704
	31.44	0.78586	0.68021	0.65975	0.64757
	31.5	0.78868	0.67933	0.65926	0.64819
	31.56	0.78614	0.68049	0.66056	0.64831
	31.62	0.78615	0.68012	0.65877	0.64672
	31.68	0.78612	0.68083	0.6582	0.64606
	31.74	0.78522	0.67887	0.65899	0.64758
	31.8	0.78434	0.67823	0.65899	0.64743
	31.86	0.78466	0.68017	0.65949	0.64761
	31.92	0.7837	0.68175	0.65948	0.64655
	31.98	0.78245	0.68207	0.65999	0.64549
	32.04	0.78622	0.67937	0.65777	0.64517
	32.1	0.78627	0.67937	0.65822	0.64745
	32.16	0.78368	0.67885	0.65744	0.64632
	32.22	0.78067	0.68121	0.65748	0.64588
	32.28	0.78248	0.67811	0.65872	0.64509
	32.34	0.78338	0.67854	0.65755	0.64513
	32.4	0.7866	0.68003	0.65627	0.64618
	32.46	0.78427	0.68042	0.6596	0.64636
	32.52	0.78233	0.67978	0.65685	0.64345
	32.58	0.78561	0.67932	0.65468	0.64531
	32.64	0.78322	0.68021	0.65895	0.64677
	32.7	0.78256	0.67617	0.6558	0.64453
	32.76	0.78137	0.67803	0.65872	0.64532
	32.82	0.7847	0.67979	0.65748	0.64613
	32.88	0.78341	0.67923	0.65828	0.64558
	32.94	0.78076	0.67917	0.65659	0.64469
	33	0.78467	0.6773	0.65765	0.64489
	33.06	0.78175	0.67797	0.65624	0.64591
	33.12	0.78179	0.6776	0.65726	0.64264
	33.18	0.78216	0.67687	0.65698	0.64517
	33.24	0.78336	0.6756	0.65737	0.64688
	33.3	0.78197	0.6769	0.65529	0.64231
	33.36	0.78065	0.67679	0.65814	0.64378
	33.42	0.78233	0.67634	0.6584	0.64487
	33.48	0.78148	0.6762	0.6549	0.64533
	33.54	0.78169	0.67512	0.65522	0.6446
	33.6	0.78127	0.67576	0.65831	0.64462
	33.66	0.78209	0.67598	0.65543	0.64552
	33.72	0.78139	0.67707	0.65801	0.6431
	33.78	0.7776	0.67548	0.65355	0.64477
	33.84	0.77819	0.67261	0.65782	0.64471
	33.9	0.78028	0.67659	0.65573	0.64369
	33.96	0.77883	0.67506	0.65697	0.64513
	34.02	0.77747	0.67665	0.65525	0.64393
	34.08	0.78012	0.67648	0.65509	0.64423
	34.14	0.7783	0.6755	0.6555	0.64457
	34.2	0.78191	0.67641	0.65531	0.64399
	34.26	0.77858	0.67637	0.65497	0.64386
	34.32	0.77765	0.67438	0.65408	0.64555
	34.38	0.77741	0.67387	0.65715	0.6438
	34.44	0.77862	0.67568	0.65548	0.64498
	34.5	0.77844	0.67513	0.65576	0.6423
	34.56	0.77725	0.67448	0.65527	0.64391
	34.62	0.77881	0.67377	0.65464	0.64434
	34.68	0.78125	0.67384	0.65511	0.64411
	34.74	0.77663	0.67362	0.65677	0.64449
	34.8	0.7764	0.67298	0.65477	0.64472
	34.86	0.77795	0.67262	0.65172	0.64553
	34.92	0.77748	0.6736	0.6541	0.64415
	34.98	0.77941	0.67292	0.65158	0.64426
	35.04	0.77897	0.67412	0.65615	0.64402
	35.1	0.77901	0.67442	0.65507	0.64529
	35.16	0.7741	0.67295	0.65507	0.64425
	35.22	0.77827	0.67167	0.65486	0.64251
	35.28	0.77928	0.67424	0.65504	0.64522
	35.34	0.77613	0.67198	0.65566	0.64485
	35.4	0.77533	0.67083	0.65393	0.6435
	35.46	0.7756	0.67201	0.65355	0.64359
	35.52	0.77794	0.66998	0.65148	0.63932
	35.58	0.7749	0.67197	0.65436	0.64247
	35.64	0.7761	0.67616	0.65324	0.64291
	35.7	0.77554	0.67304	0.65433	0.64278
	35.76	0.77547	0.67211	0.65269	0.64342
	35.82	0.77614	0.67479	0.65555	0.64241
	35.88	0.77586	0.67269	0.6534	0.64185
	35.94	0.77566	0.67221	0.65443	0.64283
	36	0.77574	0.67152	0.65411	0.64297
	36.06	0.77435	0.6725	0.65301	0.64174
	36.12	0.77466	0.66951	0.65416	0.64274
	36.18	0.77629	0.67309	0.65276	0.64382
	36.24	0.7747	0.67337	0.6527	0.64259
	36.3	0.77499	0.67275	0.65282	0.64481
	36.36	0.77499	0.6719	0.6499	0.64265
	36.42	0.77389	0.67231	0.65224	0.64361
	36.48	0.77484	0.67072	0.65155	0.64246
	36.54	0.77467	0.67335	0.65327	0.6429
	36.6	0.77234	0.67145	0.65149	0.64135
	36.66	0.77519	0.67309	0.65117	0.64154
	36.72	0.77059	0.67105	0.6521	0.64356
	36.78	0.77316	0.67133	0.65094	0.64335
	36.84	0.77454	0.67017	0.65116	0.64138
	36.9	0.77277	0.66979	0.65295	0.64345
	36.96	0.77363	0.67128	0.65091	0.64017
	37.02	0.77304	0.6697	0.65235	0.64288
	37.08	0.77157	0.67067	0.65331	0.64388
	37.14	0.77172	0.66875	0.65059	0.64316
	37.2	0.77406	0.67045	0.65354	0.64482
	37.26	0.7684	0.67167	0.65423	0.64334
	37.32	0.77273	0.66897	0.6525	0.64382
	37.38	0.77144	0.66824	0.65071	0.6406
	37.44	0.77223	0.66987	0.65201	0.64253
	37.5	0.77139	0.67067	0.65195	0.64251
	37.56	0.77054	0.66856	0.65235	0.64072
	37.62	0.77467	0.66855	0.65144	0.64088
	37.68	0.77098	0.66985	0.65338	0.64216
	37.74	0.76846	0.66882	0.65042	0.64109
	37.8	0.77125	0.67	0.65319	0.6393
	37.86	0.77298	0.67118	0.64979	0.64053
	37.92	0.77203	0.66849	0.64891	0.6416
	37.98	0.77047	0.67053	0.65158	0.64119
	38.04	0.76886	0.67042	0.65128	0.64061
	38.1	0.76983	0.66806	0.65163	0.64238
	38.16	0.76871	0.66921	0.6503	0.6418
	38.22	0.76789	0.66595	0.64872	0.64194
	38.28	0.76777	0.66771	0.64975	0.6412
	38.34	0.7694	0.66744	0.64992	0.64223
	38.4	0.76772	0.66806	0.64986	0.64116
	38.46	0.7674	0.66864	0.65275	0.64041
	38.52	0.7688	0.66628	0.65074	0.64059
	38.58	0.77176	0.66826	0.65089	0.64175
	38.64	0.77012	0.6676	0.65031	0.64156
	38.7	0.7703	0.6704	0.65021	0.64226
	38.76	0.76874	0.67048	0.65031	0.64202
	38.82	0.76841	0.6679	0.64911	0.64346
	38.88	0.76949	0.67053	0.64997	0.64144
	38.94	0.76891	0.66532	0.64923	0.63944
	39	0.76692	0.66782	0.64963	0.64007
	39.06	0.76881	0.66814	0.64948	0.64145
	39.12	0.77016	0.66761	0.64707	0.63965
	39.18	0.77023	0.66862	0.64736	0.6397
	39.24	0.76749	0.66638	0.64832	0.64016
	39.3	0.76694	0.66658	0.65115	0.64008
	39.36	0.76833	0.66646	0.64885	0.63828
	39.42	0.76808	0.66392	0.64911	0.64038
	39.48	0.76875	0.66677	0.6486	0.64117
	39.54	0.76814	0.66848	0.64967	0.63988
	39.6	0.7662	0.66623	0.64783	0.64195
	39.66	0.7666	0.66683	0.64756	0.64137
	39.72	0.76634	0.66758	0.64797	0.64186
	39.78	0.76713	0.66641	0.64982	0.64086
	39.84	0.76525	0.66677	0.6488	0.64128
	39.9	0.76845	0.66866	0.64974	0.64066
	39.96	0.76917	0.66729	0.65192	0.64079
	40.02	0.76832	0.66362	0.64996	0.64321
	40.08	0.76764	0.66619	0.64861	0.64041
	40.14	0.77104	0.66642	0.64882	0.63824
	40.2	0.77004	0.66633	0.64793	0.63944
	40.26	0.77016	0.66505	0.64685	0.64039
	40.32	0.76998	0.66819	0.65035	0.64176
	40.38	0.7678	0.66429	0.64859	0.64157
	40.44	0.77027	0.6661	0.64739	0.64118
	40.5	0.76828	0.66952	0.64803	0.63973
	40.56	0.76841	0.668	0.64631	0.64139
	40.62	0.7687	0.66782	0.64785	0.63883
	40.68	0.76823	0.66881	0.64876	0.63895
	40.74	0.76951	0.67134	0.64946	0.63919
	40.8	0.76844	0.66825	0.64804	0.63834
	40.86	0.76488	0.67054	0.6484	0.63997
	40.92	0.76616	0.6669	0.64873	0.64068
	40.98	0.76923	0.66942	0.64868	0.64231
	41.04	0.76711	0.66725	0.64838	0.64114
	41.1	0.76865	0.66958	0.64936	0.64029
	41.16	0.76873	0.66728	0.64622	0.63861
	41.22	0.76843	0.66914	0.64693	0.64105
	41.28	0.76643	0.66667	0.64779	0.64117
	41.34	0.76666	0.66636	0.64703	0.64008
	41.4	0.76414	0.66932	0.64724	0.63951
	41.46	0.76488	0.6689	0.64628	0.64024
	41.52	0.76521	0.66725	0.64829	0.64177
	41.58	0.7651	0.6672	0.64732	0.63986
	41.64	0.76492	0.66817	0.64732	0.63673
	41.7	0.7675	0.66658	0.64764	0.63937
	41.76	0.76781	0.66707	0.64627	0.64146
	41.82	0.76575	0.66813	0.64711	0.64003
	41.88	0.76355	0.66554	0.64807	0.63797
	41.94	0.76525	0.66691	0.6467	0.63906
	42	0.76551	0.66489	0.64867	0.64156
	42.06	0.76572	0.66585	0.64672	0.63879
	42.12	0.76518	0.66492	0.64673	0.63994
	42.18	0.765	0.66835	0.64789	0.63867
	42.24	0.76284	0.66416	0.64573	0.63783
	42.3	0.76512	0.66572	0.64447	0.63877
	42.36	0.769	0.66585	0.64644	0.63758
	42.42	0.76704	0.66673	0.646	0.6396
	42.48	0.76539	0.66754	0.64485	0.6387
	42.54	0.76598	0.66895	0.64523	0.6376
	42.6	0.76263	0.66632	0.64445	0.63932
	42.66	0.76516	0.66611	0.64687	0.63817
	42.72	0.76301	0.66724	0.64417	0.63912
	42.78	0.7649	0.66581	0.6457	0.63706
	42.84	0.76386	0.66352	0.64248	0.63784
	42.9	0.76463	0.66743	0.64512	0.63654
	42.96	0.76352	0.66318	0.64569	0.63818
	43.02	0.7637	0.66732	0.6453	0.63961
	43.08	0.76098	0.66385	0.64467	0.63906
	43.14	0.76429	0.66714	0.64494	0.63871
	43.2	0.7617	0.66406	0.64458	0.63936
	43.26	0.76228	0.66588	0.64543	0.64016
	43.32	0.76284	0.66457	0.64618	0.63761
	43.38	0.76434	0.66513	0.64375	0.63721
	43.44	0.76245	0.66542	0.64466	0.63764
	43.5	0.76295	0.66455	0.64349	0.63826
	43.56	0.76384	0.66485	0.64642	0.63916
	43.62	0.76252	0.6655	0.64441	0.63916
	43.68	0.76186	0.66131	0.64465	0.64018
	43.74	0.76292	0.66261	0.64438	0.63741
	43.8	0.76249	0.66473	0.6461	0.63926
	43.86	0.76201	0.66453	0.64407	0.63929
	43.92	0.76275	0.66393	0.64404	0.63869
	43.98	0.76508	0.66323	0.64444	0.63893
	44.04	0.76082	0.66546	0.6448	0.63689
	44.1	0.76206	0.66438	0.64418	0.63797
	44.16	0.76377	0.66528	0.64499	0.64023
	44.22	0.7602	0.66452	0.64718	0.63666
	44.28	0.76174	0.66328	0.64496	0.6389
	44.34	0.76047	0.66391	0.6458	0.63863
	44.4	0.76128	0.66427	0.64572	0.63988
	44.46	0.76394	0.66212	0.64637	0.63531
	44.52	0.76321	0.66509	0.64555	0.63818
	44.58	0.76405	0.66364	0.64401	0.64254
	44.64	0.75949	0.663	0.64486	0.63491
	44.7	0.7603	0.66081	0.6453	0.64062
	44.76	0.76106	0.66226	0.64487	0.6381
	44.82	0.76194	0.66162	0.64446	0.63933
	44.88	0.75961	0.66284	0.64215	0.63837
	44.94	0.76405	0.66279	0.64469	0.63629
	45	0.76056	0.66294	0.64395	0.64054
	45.06	0.76161	0.66327	0.64385	0.63893
	45.12	0.76054	0.66443	0.64203	0.63715
	45.18	0.76209	0.6619	0.64391	0.63867
	45.24	0.76196	0.66201	0.64319	0.63878
	45.3	0.75952	0.662	0.64691	0.63628
	45.36	0.75908	0.66387	0.64377	0.63905
	45.42	0.76161	0.66306	0.64379	0.63938
	45.48	0.76086	0.66176	0.64365	0.63955
	45.54	0.76036	0.66199	0.64433	0.63813
	45.6	0.75905	0.6634	0.64227	0.63807
	45.66	0.75873	0.66375	0.64148	0.63724
	45.72	0.75914	0.66398	0.64302	0.63659
	45.78	0.75687	0.66232	0.64238	0.63812
	45.84	0.75854	0.66414	0.64329	0.63724
	45.9	0.76011	0.6628	0.64348	0.63732
	45.96	0.75845	0.6625	0.64427	0.63784
	46.02	0.76155	0.66455	0.64241	0.6395
	46.08	0.76029	0.66397	0.64316	0.63714
	46.14	0.76112	0.66327	0.64438	0.63769
	46.2	0.75886	0.66137	0.64132	0.63734
	46.26	0.75918	0.66338	0.6418	0.63878
	46.32	0.76028	0.66423	0.64529	0.63906
	46.38	0.75923	0.66081	0.64352	0.63913
	46.44	0.75934	0.66219	0.64229	0.63858
	46.5	0.75954	0.66302	0.64507	0.63776
	46.56	0.75771	0.66307	0.64301	0.63632
	46.62	0.75828	0.6617	0.64545	0.63573
	46.68	0.75805	0.66114	0.6423	0.64118
	46.74	0.7565	0.66347	0.6423	0.63707
	46.8	0.75885	0.66144	0.64347	0.6361
	46.86	0.75695	0.66229	0.64324	0.63729
	46.92	0.76018	0.66166	0.64238	0.63686
	46.98	0.75816	0.6605	0.6403	0.6392
	47.04	0.75877	0.66089	0.64206	0.63629
	47.1	0.75864	0.6596	0.64092	0.63833
	47.16	0.75829	0.66008	0.64305	0.63514
	47.22	0.75779	0.66062	0.64187	0.63695
	47.28	0.75727	0.66076	0.64267	0.63734
	47.34	0.75638	0.66126	0.64077	0.63624
	47.4	0.75637	0.66195	0.64277	0.63873
	47.46	0.75723	0.65851	0.64141	0.63674
	47.52	0.75581	0.66186	0.64083	0.63774
	47.58	0.75611	0.6593	0.64209	0.63667
	47.64	0.75702	0.66247	0.63981	0.63842
	47.7	0.75709	0.65779	0.64211	0.63609
	47.76	0.75888	0.65902	0.64293	0.63597
	47.82	0.75819	0.66125	0.6416	0.63593
	47.88	0.7582	0.66066	0.64047	0.6366
	47.94	0.75797	0.6618	0.63978	0.63642
	48	0.75733	0.66147	0.64106	0.6378
	48.06	0.75615	0.66067	0.64123	0.63629
	48.12	0.75786	0.66265	0.64364	0.63794
	48.18	0.75641	0.65995	0.63917	0.63649
	48.24	0.75801	0.66052	0.64235	0.63734
	48.3	0.7566	0.66158	0.64304	0.63798
	48.36	0.75632	0.66195	0.64029	0.63795
	48.42	0.75653	0.65974	0.64442	0.6369
	48.48	0.75428	0.66232	0.64207	0.63558
	48.54	0.75637	0.65989	0.63974	0.63717
	48.6	0.75531	0.66002	0.64279	0.63872
	48.66	0.75704	0.6594	0.64248	0.63509
	48.72	0.75662	0.6606	0.64003	0.63909
	48.78	0.75614	0.65967	0.64186	0.63537
	48.84	0.75546	0.65888	0.6414	0.63685
	48.9	0.75571	0.65852	0.63938	0.63667
	48.96	0.75706	0.66136	0.64339	0.63659
	49.02	0.75564	0.66045	0.64158	0.63644
	49.08	0.75528	0.66152	0.64036	0.63804
	49.14	0.75376	0.65878	0.6424	0.63898
	49.2	0.75354	0.66065	0.64104	0.63745
	49.26	0.75313	0.65796	0.64297	0.63605
	49.32	0.75524	0.65756	0.64045	0.63969
	49.38	0.75824	0.66048	0.64089	0.63786
	49.44	0.75578	0.66012	0.63985	0.63839
	49.5	0.75416	0.65897	0.64043	0.63617
	49.56	0.75424	0.65968	0.63824	0.63578
	49.62	0.75673	0.65909	0.63844	0.63803
	49.68	0.75492	0.66022	0.64339	0.63795
	49.74	0.75455	0.65742	0.64102	0.63672
	49.8	0.75325	0.66007	0.64033	0.63575
	49.86	0.75509	0.65859	0.63755	0.63662
	49.92	0.75249	0.658	0.63872	0.63658
	49.98	0.75189	0.65959	0.63802	0.63741
	50.04	0.75352	0.65784	0.63994	0.63766
	50.1	0.75009	0.65805	0.64001	0.63525
	50.16	0.75412	0.65967	0.63915	0.63801
	50.22	0.75569	0.66026	0.63859	0.63544
	50.28	0.75671	0.65714	0.64147	0.6372
	50.34	0.75319	0.66048	0.64137	0.63605
	50.4	0.75309	0.65981	0.64036	0.63536
	50.46	0.75068	0.65792	0.64006	0.63567
	50.52	0.75314	0.65975	0.63815	0.63537
	50.58	0.75348	0.65583	0.64163	0.63674
	50.64	0.7544	0.65927	0.63904	0.63692
	50.7	0.75323	0.65842	0.64093	0.63515
	50.76	0.75222	0.65489	0.6389	0.63708
	50.82	0.75299	0.65797	0.63904	0.63784
	50.88	0.74915	0.6587	0.64131	0.63725
	50.94	0.75375	0.65735	0.64108	0.63785
	51	0.75356	0.65653	0.6369	0.63602
	51.06	0.75635	0.65869	0.63713	0.63742
	51.12	0.75451	0.65799	0.64105	0.63736
	51.18	0.75358	0.65552	0.63872	0.63737
	51.24	0.75321	0.65635	0.64386	0.63916
	51.3	0.75456	0.65755	0.639	0.63714
	51.36	0.75048	0.65825	0.64118	0.63439
	51.42	0.75021	0.65818	0.63807	0.63612
	51.48	0.75042	0.65956	0.63919	0.63492
	51.54	0.75092	0.65523	0.63832	0.63659
	51.6	0.7498	0.6581	0.64057	0.63769
	51.66	0.75113	0.65821	0.63961	0.63549
	51.72	0.75198	0.6573	0.63866	0.63798
	51.78	0.7522	0.65795	0.63869	0.63666
	51.84	0.75129	0.65896	0.64198	0.63763
	51.9	0.74948	0.65518	0.63963	0.63445
	51.96	0.75093	0.65798	0.64022	0.63564
	52.02	0.74874	0.65375	0.63963	0.63437
	52.08	0.75091	0.65503	0.64077	0.63756
	52.14	0.75071	0.65585	0.63925	0.6352
	52.2	0.75089	0.65509	0.63893	0.63699
	52.26	0.74854	0.65687	0.64126	0.63652
	52.32	0.75144	0.65744	0.64019	0.63613
	52.38	0.75093	0.65666	0.63897	0.63919
	52.44	0.75067	0.65679	0.63824	0.63636
	52.5	0.74938	0.65718	0.63993	0.63645
	52.56	0.75158	0.6566	0.64014	0.63542
	52.62	0.75076	0.6569	0.63806	0.63896
	52.68	0.75112	0.65519	0.63918	0.64204
	52.74	0.74985	0.65755	0.63865	0.64125
	52.8	0.7514	0.65653	0.6399	0.64014
	52.86	0.75084	0.65344	0.63831	0.63891
	52.92	0.75107	0.65524	0.63888	0.64222
	52.98	0.74637	0.65502	0.63965	0.64026
	53.04	0.74841	0.65674	0.6378	0.64226
	53.1	0.74943	0.65395	0.63794	0.63945
	53.16	0.74816	0.65623	0.63688	0.6407
	53.22	0.75169	0.65688	0.63828	0.63975
	53.28	0.75023	0.65732	0.6393	0.63976
	53.34	0.75051	0.65586	0.63949	0.64003
	53.4	0.75138	0.6539	0.63666	0.64085
	53.46	0.75029	0.65458	0.63886	0.63987
	53.52	0.74972	0.65653	0.63815	0.63922
	53.58	0.74949	0.65643	0.6399	0.63745
	53.64	0.74857	0.65325	0.63745	0.64069
	53.7	0.74919	0.65503	0.63952	0.64023
	53.76	0.74872	0.65695	0.63952	0.64047
	53.82	0.74934	0.65563	0.63898	0.64039
	53.88	0.7505	0.65699	0.63866	0.64157
	53.94	0.74898	0.65557	0.63775	0.64236
	54	0.74929	0.65415	0.64087	0.64218
	54.06	0.74926	0.6549	0.64028	0.64079
	54.12	0.74877	0.65619	0.63785	0.63982
	54.18	0.74746	0.65817	0.63741	0.64267
	54.24	0.7482	0.65668	0.64034	0.64014
	54.3	0.7488	0.65324	0.63935	0.63735
	54.36	0.74545	0.6536	0.63775	0.63969
	54.42	0.75093	0.65392	0.63881	0.64118
	54.48	0.74901	0.65535	0.63692	0.64013
	54.54	0.74892	0.65486	0.63827	0.64146
	54.6	0.74828	0.65593	0.63881	0.63859
	54.66	0.74829	0.65405	0.63785	0.64177
	54.72	0.74869	0.657	0.63781	0.64011
	54.78	0.75045	0.65583	0.63828	0.64088
	54.84	0.74531	0.65551	0.63765	0.63879
	54.9	0.74713	0.65306	0.6364	0.63962
	54.96	0.74605	0.65622	0.63698	0.63755
	55.02	0.74857	0.65396	0.6362	0.64022
	55.08	0.74998	0.65548	0.63955	0.63991
	55.14	0.7459	0.6563	0.63865	0.64266
	55.2	0.74888	0.65368	0.63769	0.64139
	55.26	0.74815	0.65644	0.63589	0.63868
	55.32	0.74762	0.65564	0.63634	0.63988
	55.38	0.74608	0.65236	0.63825	0.63881
	55.44	0.74675	0.65266	0.63741	0.64037
	55.5	0.74577	0.65572	0.63776	0.63779
	55.56	0.74801	0.65546	0.63646	0.64005
	55.62	0.74694	0.65434	0.64069	0.63739
	55.68	0.74805	0.65389	0.63755	0.64023
	55.74	0.74612	0.65541	0.63948	0.6416
	55.8	0.74689	0.6544	0.64187	0.63982
	55.86	0.74741	0.65365	0.63783	0.63828
	55.92	0.74867	0.65469	0.6381	0.63962
	55.98	0.7446	0.65341	0.64076	0.6388
	56.04	0.74974	0.6553	0.63762	0.63687
	56.1	0.74554	0.65467	0.63808	0.63901
	56.16	0.74613	0.65195	0.63704	0.64033
	56.22	0.74481	0.65494	0.63926	0.63874
	56.28	0.74698	0.65582	0.63896	0.64033
	56.34	0.74683	0.65441	0.63979	0.64013
	56.4	0.74703	0.65392	0.63507	0.64031
	56.46	0.74602	0.6556	0.6358	0.64005
	56.52	0.7453	0.65323	0.63789	0.63985
	56.58	0.74607	0.65221	0.63619	0.63871
	56.64	0.74701	0.65333	0.63789	0.63803
	56.7	0.74695	0.65392	0.63515	0.63957
	56.76	0.74438	0.65046	0.637	0.63913
	56.82	0.74606	0.65429	0.63507	0.6384
	56.88	0.74648	0.65311	0.63872	0.63765
	56.94	0.74684	0.65403	0.63605	0.63917
	57	0.74662	0.65091	0.63685	0.63794
	57.06	0.7449	0.65342	0.63722	0.6379
	57.12	0.74533	0.65218	0.63792	0.63955
	57.18	0.74368	0.6525	0.63825	0.64101
	57.24	0.74582	0.65367	0.63683	0.64015
	57.3	0.7449	0.65242	0.63457	0.6384
	57.36	0.74423	0.65375	0.63566	0.63968
	57.42	0.74495	0.65331	0.63789	0.63868
	57.48	0.74458	0.65335	0.63797	0.63865
	57.54	0.74464	0.65259	0.63967	0.64066
	57.6	0.74618	0.65385	0.63446	0.63743
	57.66	0.74673	0.65469	0.63688	0.63831
	57.72	0.74649	0.65514	0.63637	0.63728
	57.78	0.74564	0.65187	0.63668	0.63853
	57.84	0.74527	0.6531	0.63685	0.64084
	57.9	0.74696	0.65008	0.63549	0.63808
	57.96	0.74756	0.65244	0.63618	0.63907
	58.02	0.74515	0.65284	0.63431	0.63833
	58.08	0.7478	0.65296	0.63617	0.64024
	58.14	0.74347	0.65331	0.63615	0.63828
	58.2	0.74216	0.65191	0.63719	0.64008
	58.26	0.74521	0.65163	0.63606	0.63935
	58.32	0.74538	0.65542	0.63955	0.63775
	58.38	0.74474	0.65159	0.63645	0.63774
	58.44	0.7434	0.65135	0.63459	0.64066
	58.5	0.74132	0.65196	0.63329	0.63906
	58.56	0.74511	0.65191	0.63695	0.63912
	58.62	0.7438	0.653	0.63573	0.63962
	58.68	0.74561	0.65195	0.6369	0.63876
	58.74	0.74359	0.65316	0.63593	0.6374
	58.8	0.7459	0.65071	0.63535	0.64045
	58.86	0.74309	0.6513	0.63653	0.6417
	58.92	0.74481	0.65181	0.63505	0.63627
	58.98	0.74505	0.65155	0.63475	0.63832
	59.04	0.74363	0.65159	0.6361	0.64006
	59.1	0.74404	0.65426	0.63447	0.63862
	59.16	0.74464	0.65236	0.63484	0.63889
	59.22	0.74517	0.65177	0.63638	0.63771
	59.28	0.74369	0.65343	0.63631	0.64074
	59.34	0.74439	0.65289	0.63748	0.63907
	59.4	0.74481	0.65211	0.63605	0.63752
	59.46	0.74419	0.65071	0.63571	0.63852
	59.52	0.74575	0.65238	0.6356	0.63996
	59.58	0.74469	0.65424	0.63401	0.63964
	59.64	0.7454	0.64995	0.63513	0.63681
	59.7	0.74294	0.6518	0.63353	0.63953
	59.76	0.74586	0.65311	0.63306	0.63935
	59.82	0.74433	0.65083	0.63607	0.63698
	59.88	0.74445	0.65024	0.6378	0.63825
	59.94	0.74345	0.65232	0.63331	0.63902
	60	0.74311	0.65073	0.63534	0.63865

## Sheet: Fig. 2c
	kon (M-1 s-1)						mean kon (M-1 s-1)
RNC(ss)	966000	1100600	829090	866810	1098900		972280
RNC(ss) + RRLHSW	377180	430420	487860	534010			457368
RNC(ss) + WGHSW	565860	584130	596310	594530			585208
RNC(ssmt)	512470	488170	571190				523943
RNC(ssmt) + RRLHSW	25390	24039	19169				22866
RNC(ssmt2)	43525	39298	45907				42910
RNC(ssmt2) + RRLHSW	6825.7	5636.3	3036.8				5166.27
RNC(ssmt2) + WGHSW	4075.8	14575	5993.7				8214.83

## Sheet: Fig. 2d
times(s)	RNC(ss)	RNC(ss) + NAC	RNC(ssmt)	RNC(ssmt) + NAC
0.12	1	1	1	1
0.24	0.98046	0.98866	0.98609	0.9959
0.36	0.97356	0.97263	0.97871	0.9988
0.48	0.96309	0.9657	0.97181	0.99769
0.6	0.95775	0.95695	0.96499	0.99945
0.72	0.94759	0.95096	0.95891	0.9958
0.84	0.94419	0.94122	0.95377	0.99616
0.96	0.93458	0.93845	0.94818	0.99585
1.08	0.93221	0.93234	0.93937	0.99619
1.2	0.92784	0.92708	0.93811	0.99393
1.32	0.92483	0.92396	0.92808	0.99419
1.44	0.91729	0.91838	0.92623	0.99366
1.56	0.91494	0.91178	0.92297	0.99448
1.68	0.90862	0.91197	0.91734	0.99084
1.8	0.90315	0.90334	0.91279	0.99192
1.92	0.90077	0.90228	0.90727	0.99057
2.04	0.89459	0.89585	0.90298	0.99258
2.16	0.88907	0.89538	0.89855	0.99216
2.28	0.89038	0.89086	0.89528	0.99335
2.4	0.88435	0.88546	0.89024	0.99197
2.52	0.88109	0.88174	0.88776	0.99027
2.64	0.87716	0.87951	0.8824	0.98728
2.76	0.87633	0.87437	0.87831	0.98841
2.88	0.87036	0.87105	0.87889	0.98971
3	0.86559	0.86934	0.87263	0.99302
3.12	0.86487	0.86752	0.86777	0.99037
3.24	0.85875	0.86341	0.86136	0.99064
3.36	0.85654	0.86105	0.86216	0.98465
3.48	0.85463	0.85767	0.85907	0.98909
3.6	0.8528	0.85687	0.85708	0.9891
3.72	0.84685	0.8507	0.85231	0.98636
3.84	0.84785	0.84934	0.85107	0.99309
3.96	0.84441	0.84586	0.84887	0.99071
4.08	0.84293	0.84303	0.84333	0.985
4.2	0.83903	0.84055	0.84122	0.98906
4.32	0.83958	0.83713	0.83889	0.98482
4.44	0.83354	0.83777	0.83397	0.98963
4.56	0.83067	0.83009	0.83254	0.98525
4.68	0.83025	0.82835	0.83106	0.98757
4.8	0.82696	0.83098	0.82729	0.98773
4.92	0.82497	0.8277	0.82611	0.98841
5.04	0.82209	0.82304	0.82249	0.99012
5.16	0.82162	0.82215	0.82133	0.98541
5.28	0.81828	0.81561	0.81997	0.98853
5.4	0.81587	0.81617	0.81689	0.98797
5.52	0.81598	0.81485	0.8133	0.98125
5.64	0.81433	0.81128	0.81091	0.99096
5.76	0.81216	0.80834	0.81202	0.98248
5.88	0.8087	0.8074	0.80745	0.98385
6	0.80569	0.80499	0.80545	0.98707
6.12	0.80597	0.80433	0.80411	0.98316
6.24	0.80132	0.8002	0.80097	0.98744
6.36	0.80259	0.79837	0.7986	0.98764
6.48	0.79993	0.79847	0.79955	0.98243
6.6	0.7966	0.79262	0.79533	0.98527
6.72	0.79571	0.79185	0.79347	0.98739
6.84	0.79148	0.79286	0.79262	0.98406
6.96	0.79103	0.78996	0.79088	0.9836
7.08	0.79077	0.78719	0.78419	0.98747
7.2	0.78928	0.78225	0.78774	0.98175
7.32	0.78735	0.7866	0.78313	0.98384
7.44	0.787	0.78311	0.78487	0.98202
7.56	0.78368	0.78353	0.78238	0.98607
7.68	0.78286	0.77757	0.78111	0.98225
7.8	0.78165	0.775	0.77952	0.98483
7.92	0.77859	0.77358	0.77625	0.98231
8.04	0.77898	0.77139	0.77474	0.98448
8.16	0.77388	0.77033	0.77314	0.98407
8.28	0.77657	0.77079	0.77022	0.98506
8.4	0.77632	0.76739	0.77154	0.98099
8.52	0.77361	0.76565	0.77156	0.98426
8.64	0.77069	0.76682	0.7677	0.98654
8.76	0.77009	0.767	0.76707	0.98039
8.88	0.77083	0.7627	0.7661	0.9834
9	0.7674	0.76144	0.7624	0.98697
9.12	0.76497	0.75503	0.7635	0.9855
9.24	0.76371	0.75459	0.76211	0.98453
9.36	0.76322	0.75427	0.76228	0.98174
9.48	0.76201	0.7552	0.75882	0.98205
9.6	0.76012	0.75386	0.7584	0.98073
9.72	0.75986	0.75147	0.75816	0.98189
9.84	0.75866	0.74978	0.75646	0.97897
9.96	0.75766	0.74718	0.75349	0.9799
10.08	0.75523	0.74855	0.75177	0.98271
10.2	0.75423	0.74844	0.75083	0.97927
10.32	0.75542	0.74627	0.75039	0.97921
10.44	0.7533	0.74329	0.7494	0.97976
10.56	0.75157	0.74491	0.7468	0.98181
10.68	0.75039	0.74282	0.74785	0.9819
10.8	0.74863	0.74033	0.74676	0.98099
10.92	0.75056	0.73771	0.7473	0.97725
11.04	0.74776	0.73465	0.74474	0.97787
11.16	0.74649	0.73338	0.74344	0.9802
11.28	0.74528	0.73244	0.74188	0.979
11.4	0.74527	0.73299	0.74105	0.98048
11.52	0.74349	0.73239	0.74191	0.97994
11.64	0.74318	0.72932	0.73715	0.9798
11.76	0.73999	0.72787	0.73642	0.97884
11.88	0.74088	0.72761	0.73379	0.97756
12	0.73945	0.72631	0.73481	0.97727
12.12	0.73832	0.72527	0.73611	0.98112
12.24	0.73822	0.7241	0.73423	0.98173
12.36	0.73791	0.72081	0.73384	0.97905
12.48	0.73534	0.7223	0.73168	0.97761
12.6	0.7359	0.71804	0.72991	0.97808
12.72	0.73473	0.72181	0.73071	0.97608
12.84	0.73242	0.72103	0.73187	0.9786
12.96	0.73272	0.71786	0.7316	0.97621
13.08	0.7329	0.71847	0.73004	0.97693
13.2	0.73026	0.71379	0.72911	0.97902
13.32	0.73028	0.71675	0.72778	0.97375
13.44	0.7303	0.71241	0.72939	0.9754
13.56	0.7293	0.71224	0.72701	0.97931
13.68	0.72609	0.70975	0.72671	0.97873
13.8	0.72669	0.7084	0.7215	0.97687
13.92	0.72623	0.70621	0.72445	0.97599
14.04	0.72716	0.70973	0.72276	0.97528
14.16	0.72511	0.7096	0.71948	0.98015
14.28	0.72701	0.70697	0.72282	0.97644
14.4	0.72173	0.7053	0.72228	0.97691
14.52	0.72229	0.70241	0.72025	0.97583
14.64	0.72365	0.70481	0.72165	0.9794
14.76	0.72129	0.70226	0.71723	0.97415
14.88	0.72137	0.70257	0.71754	0.97616
15	0.72158	0.69973	0.71615	0.97412
15.12	0.71814	0.6994	0.71727	0.9732
15.24	0.71919	0.7011	0.7155	0.97382
15.36	0.71914	0.6976	0.71551	0.97403
15.48	0.71869	0.69718	0.71536	0.97062
15.6	0.71642	0.69443	0.71403	0.97529
15.72	0.71618	0.69672	0.71316	0.97514
15.84	0.71786	0.69518	0.71222	0.97609
15.96	0.71693	0.69301	0.71302	0.97393
16.08	0.7135	0.69311	0.71409	0.97206
16.2	0.71436	0.69262	0.71188	0.97377
16.32	0.71519	0.6915	0.71008	0.97618
16.44	0.71397	0.69019	0.70903	0.97162
16.56	0.71415	0.69109	0.7109	0.97112
16.68	0.71132	0.69196	0.70909	0.97321
16.8	0.71127	0.69015	0.71159	0.97358
16.92	0.71164	0.68859	0.70679	0.97475
17.04	0.71147	0.68848	0.70764	0.97158
17.16	0.70998	0.68742	0.70784	0.97499
17.28	0.70807	0.6863	0.70764	0.9697
17.4	0.7102	0.68639	0.70632	0.97325
17.52	0.70657	0.68658	0.70633	0.97282
17.64	0.7104	0.67922	0.70611	0.97802
17.76	0.70741	0.67829	0.70457	0.97237
17.88	0.70584	0.68284	0.70423	0.97243
18	0.70583	0.67926	0.70242	0.97433
18.12	0.70434	0.67802	0.7028	0.97179
18.24	0.70455	0.67957	0.70056	0.97223
18.36	0.70313	0.67872	0.7039	0.97214
18.48	0.70277	0.67904	0.69814	0.97294
18.6	0.70336	0.67854	0.69847	0.97057
18.72	0.70169	0.67714	0.70216	0.97032
18.84	0.70236	0.6772	0.70249	0.97187
18.96	0.7016	0.68058	0.70219	0.96986
19.08	0.70359	0.67385	0.69714	0.97339
19.2	0.7032	0.67357	0.69771	0.97014
19.32	0.69949	0.67165	0.69917	0.96831
19.44	0.70065	0.67614	0.69663	0.97304
19.56	0.69765	0.67676	0.69635	0.97123
19.68	0.69846	0.66987	0.69611	0.96954
19.8	0.69891	0.67196	0.69566	0.97055
19.92	0.69826	0.67105	0.69696	0.97018
20.04	0.7013	0.66898	0.69643	0.97388
20.16	0.6979	0.66782	0.69815	0.97122
20.28	0.69686	0.66998	0.69459	0.97108
20.4	0.69718	0.66875	0.69411	0.97173
20.52	0.69668	0.66855	0.69448	0.97036
20.64	0.69213	0.66837	0.69461	0.96674
20.76	0.6947	0.66658	0.69396	0.96799
20.88	0.69652	0.66552	0.69349	0.97042
21	0.69604	0.66699	0.69425	0.96976
21.12	0.69235	0.66559	0.69338	0.96735
21.24	0.69419	0.66717	0.69185	0.96909
21.36	0.69483	0.66221	0.69102	0.96936
21.48	0.69121	0.66198	0.69298	0.96762
21.6	0.69131	0.66063	0.69032	0.96877
21.72	0.6917	0.66508	0.69396	0.96982
21.84	0.69044	0.66189	0.69275	0.97129
21.96	0.68848	0.66322	0.69226	0.97126
22.08	0.69262	0.65899	0.68843	0.97007
22.2	0.68912	0.66148	0.69013	0.96735
22.32	0.69242	0.66135	0.6924	0.9696
22.44	0.68844	0.66047	0.69091	0.96393
22.56	0.68803	0.66012	0.6897	0.97042
22.68	0.68925	0.65758	0.68783	0.97097
22.8	0.6924	0.65774	0.68824	0.96828
22.92	0.68673	0.65719	0.69024	0.96823
23.04	0.68766	0.65773	0.68655	0.96416
23.16	0.68762	0.65231	0.69059	0.96634
23.28	0.68683	0.65705	0.68858	0.96795
23.4	0.68604	0.65438	0.68583	0.96851
23.52	0.69139	0.65537	0.68698	0.96868
23.64	0.68616	0.65382	0.68924	0.96887
23.76	0.687	0.65526	0.68711	0.96684
23.88	0.68619	0.65284	0.6857	0.96688
24	0.68422	0.65175	0.68495	0.96615
24.12	0.68343	0.65047	0.68647	0.96686
24.24	0.68546	0.65183	0.6862	0.96614
24.36	0.68612	0.65128	0.68455	0.96875
24.48	0.68466	0.65183	0.68357	0.96336
24.6	0.68325	0.64865	0.68554	0.96786
24.72	0.68232	0.65317	0.68222	0.96323
24.84	0.68377	0.65148	0.68416	0.9701
24.96	0.6836	0.64873	0.68435	0.96843
25.08	0.68213	0.64809	0.68484	0.96463
25.2	0.68472	0.64709	0.68531	0.9668
25.32	0.68198	0.64865	0.68334	0.96542
25.44	0.68447	0.64952	0.68627	0.9681
25.56	0.68273	0.64295	0.68459	0.96626
25.68	0.67813	0.64652	0.68167	0.9653
25.8	0.68069	0.64697	0.68083	0.96384
25.92	0.67949	0.64537	0.68084	0.96808
26.04	0.68179	0.64577	0.68297	0.96528
26.16	0.68065	0.64533	0.68358	0.96809
26.28	0.67948	0.64352	0.68017	0.96583
26.4	0.67913	0.64449	0.67998	0.96573
26.52	0.68059	0.64326	0.68272	0.96796
26.64	0.68091	0.64345	0.68282	0.96661
26.76	0.67788	0.64434	0.68054	0.96613
26.88	0.67864	0.64127	0.68104	0.96078
27	0.67794	0.64088	0.67942	0.96558
27.12	0.6792	0.64475	0.67802	0.96699
27.24	0.67925	0.6409	0.67859	0.96527
27.36	0.67762	0.64218	0.67904	0.96374
27.48	0.67719	0.6422	0.67782	0.96307
27.6	0.67949	0.64218	0.67832	0.96416
27.72	0.67534	0.64048	0.67654	0.96678
27.84	0.67882	0.64374	0.67904	0.96216
27.96	0.6748	0.6413	0.67838	0.96489
28.08	0.67367	0.63984	0.67849	0.96349
28.2	0.67607	0.64035	0.67629	0.96325
28.32	0.67391	0.63854	0.6796	0.96279
28.44	0.67625	0.63897	0.6769	0.96146
28.56	0.67749	0.64003	0.67767	0.96494
28.68	0.67558	0.63618	0.67912	0.96727
28.8	0.67668	0.63535	0.67534	0.96252
28.92	0.67438	0.63732	0.67775	0.962
29.04	0.67531	0.63746	0.67795	0.96571
29.16	0.67475	0.63841	0.67506	0.96618
29.28	0.67574	0.63494	0.67617	0.96557
29.4	0.67262	0.63484	0.6749	0.96276
29.52	0.67281	0.63546	0.67784	0.96626
29.64	0.67678	0.6341	0.67513	0.9641
29.76	0.67268	0.63512	0.67991	0.96561
29.88	0.67306	0.6354	0.67713	0.96188
30	0.67091	0.63378	0.67679	0.96295
30.12	0.67156	0.63363	0.67786	0.96151
30.24	0.6752	0.63405	0.67329	0.96395
30.36	0.66871	0.63261	0.67619	0.96333
30.48	0.67383	0.63142	0.67401	0.96626
30.6	0.67073	0.63288	0.67493	0.96353
30.72	0.67088	0.63049	0.673	0.96498
30.84	0.67103	0.63007	0.67398	0.96364
30.96	0.67222	0.62879	0.67528	0.96378
31.08	0.67219	0.62956	0.67244	0.96409
31.2	0.66865	0.63101	0.67306	0.9635
31.32	0.6681	0.63128	0.67483	0.95968
31.44	0.67184	0.62863	0.67247	0.96262
31.56	0.67285	0.63074	0.67214	0.96433
31.68	0.66875	0.6299	0.67497	0.96336
31.8	0.6742	0.62929	0.67426	0.95947
31.92	0.67105	0.6301	0.67252	0.96029
32.04	0.67023	0.62809	0.67304	0.95879
32.16	0.67003	0.62978	0.67205	0.9614
32.28	0.66719	0.62867	0.67183	0.95859
32.4	0.6703	0.62734	0.67502	0.95946
32.52	0.67001	0.6278	0.6712	0.9633
32.64	0.66912	0.62551	0.67258	0.96422
32.76	0.66927	0.62632	0.66995	0.9627
32.88	0.66904	0.62961	0.66932	0.95865
33	0.66835	0.62775	0.67361	0.95873
33.12	0.6714	0.62519	0.67221	0.96014
33.24	0.66621	0.62728	0.67265	0.9635
33.36	0.66824	0.62583	0.67014	0.96015
33.48	0.6694	0.62811	0.67238	0.96072
33.6	0.66957	0.62458	0.67098	0.96269
33.72	0.66639	0.62632	0.6705	0.96145
33.84	0.6693	0.62575	0.67221	0.96197
33.96	0.66836	0.6237	0.67092	0.95916
34.08	0.66621	0.62316	0.6718	0.96347
34.2	0.66612	0.62313	0.66928	0.96092
34.32	0.66688	0.62698	0.67041	0.96086
34.44	0.667	0.62069	0.66763	0.95895
34.56	0.6662	0.62438	0.67024	0.95676
34.68	0.66833	0.62453	0.66971	0.96135
34.8	0.66567	0.62214	0.66931	0.95926
34.92	0.66516	0.62217	0.67027	0.95976
35.04	0.66215	0.62423	0.67101	0.95886
35.16	0.66751	0.62644	0.67015	0.95948
35.28	0.66454	0.62568	0.66886	0.96142
35.4	0.66499	0.6236	0.6689	0.96259
35.52	0.66117	0.6208	0.67009	0.96187
35.64	0.66421	0.62219	0.66948	0.9605
35.76	0.6634	0.62161	0.66802	0.96
35.88	0.66601	0.62232	0.66623	0.96059
36	0.66392	0.62172	0.6673	0.95951
36.12	0.66512	0.62004	0.66826	0.96163
36.24	0.6655	0.61946	0.66912	0.95897
36.36	0.66529	0.62023	0.66963	0.96108
36.48	0.66345	0.62042	0.66707	0.95789
36.6	0.66284	0.61964	0.66593	0.96078
36.72	0.66447	0.62132	0.66714	0.95575
36.84	0.66281	0.62163	0.66674	0.96093
36.96	0.66314	0.62044	0.6666	0.96121
37.08	0.66328	0.62314	0.67076	0.96191
37.2	0.65974	0.61755	0.66837	0.95989
37.32	0.66335	0.61976	0.66695	0.95875
37.44	0.66343	0.62109	0.66533	0.95956
37.56	0.66184	0.61858	0.6688	0.95625
37.68	0.66212	0.62154	0.6664	0.95767
37.8	0.66193	0.61978	0.66635	0.95531
37.92	0.66448	0.61742	0.66756	0.96123
38.04	0.66243	0.62001	0.6659	0.9559
38.16	0.66329	0.61635	0.66718	0.96021
38.28	0.66403	0.61599	0.66512	0.95804
38.4	0.66234	0.61939	0.66668	0.9588
38.52	0.66102	0.61958	0.66782	0.96021
38.64	0.66127	0.61549	0.66644	0.96061
38.76	0.66305	0.61813	0.66667	0.95808
38.88	0.66348	0.61584	0.66696	0.96018
39	0.66215	0.61693	0.66856	0.9571
39.12	0.66244	0.61662	0.66612	0.95994
39.24	0.66164	0.61467	0.66591	0.95567
39.36	0.66157	0.61695	0.66586	0.95959
39.48	0.65941	0.61555	0.666	0.95787
39.6	0.663	0.61265	0.66442	0.9561
39.72	0.66104	0.6162	0.6647	0.95957
39.84	0.6604	0.61618	0.66662	0.9584
39.96	0.66137	0.61518	0.66668	0.95992
40.08	0.66119	0.61638	0.66625	0.95812
40.2	0.66174	0.61489	0.66585	0.96141
40.32	0.66092	0.61574	0.66381	0.95778
40.44	0.65811	0.61543	0.66656	0.95712
40.56	0.66349	0.61482	0.66677	0.95914
40.68	0.65907	0.61271	0.66735	0.95798
40.8	0.65994	0.61476	0.66617	0.95786
40.92	0.66166	0.61362	0.66477	0.95301
41.04	0.66106	0.61259	0.66693	0.95933
41.16	0.65924	0.6142	0.66413	0.95568
41.28	0.65822	0.61315	0.66563	0.95512
41.4	0.65812	0.61326	0.66476	0.96174
41.52	0.65671	0.61398	0.66656	0.95551
41.64	0.66162	0.61406	0.66497	0.95401
41.76	0.66255	0.6138	0.66599	0.95516
41.88	0.65758	0.61075	0.66493	0.95661
42	0.65863	0.61397	0.66243	0.95944
42.12	0.65717	0.61398	0.6662	0.95568
42.24	0.657	0.61312	0.66267	0.95621
42.36	0.65915	0.60789	0.66442	0.95557
42.48	0.65747	0.60971	0.66316	0.95728
42.6	0.65893	0.61186	0.66617	0.95907
42.72	0.65777	0.6129	0.66287	0.95441
42.84	0.6586	0.61327	0.6636	0.95654
42.96	0.65914	0.61031	0.6646	0.95378
43.08	0.65728	0.61394	0.66259	0.95814
43.2	0.65957	0.61119	0.66288	0.95734
43.32	0.65811	0.61125	0.66602	0.95721
43.44	0.65749	0.6122	0.66071	0.95524
43.56	0.65725	0.61126	0.66239	0.95555
43.68	0.65801	0.61344	0.66372	0.95812
43.8	0.65499	0.6085	0.65886	0.95535
43.92	0.65911	0.61183	0.66252	0.95806
44.04	0.65936	0.60892	0.66423	0.95773
44.16	0.65883	0.60847	0.66354	0.95382
44.28	0.6586	0.61026	0.66384	0.95718
44.4	0.6572	0.60919	0.6605	0.95428
44.52	0.65443	0.61026	0.66198	0.95687
44.64	0.65501	0.60949	0.66295	0.95696
44.76	0.65751	0.60849	0.66241	0.95459
44.88	0.65511	0.61179	0.66251	0.95349
45	0.6574	0.60708	0.66202	0.95632
45.12	0.6566	0.60879	0.66255	0.95597
45.24	0.65792	0.6085	0.65976	0.95337
45.36	0.65662	0.6095	0.66137	0.95445
45.48	0.65802	0.61021	0.66387	0.95591
45.6	0.65587	0.61038	0.66159	0.9554
45.72	0.65665	0.60978	0.66344	0.95651
45.84	0.65586	0.60919	0.66182	0.95459
45.96	0.65653	0.60642	0.66165	0.95681
46.08	0.65588	0.60692	0.65906	0.95316
46.2	0.65501	0.6106	0.66361	0.95273
46.32	0.65463	0.60685	0.66249	0.95794
46.44	0.65732	0.61122	0.66309	0.95923
46.56	0.65593	0.6081	0.66232	0.95589
46.68	0.65573	0.60912	0.66045	0.9562
46.8	0.65419	0.60777	0.66268	0.95152
46.92	0.65564	0.607	0.66194	0.95349
47.04	0.65694	0.60732	0.66131	0.95411
47.16	0.65499	0.60843	0.65979	0.95262
47.28	0.65544	0.60768	0.66351	0.95574
47.4	0.65699	0.60959	0.66223	0.95458
47.52	0.65619	0.6054	0.66207	0.95717
47.64	0.65555	0.60754	0.66145	0.95714
47.76	0.65616	0.60636	0.66101	0.95376
47.88	0.6543	0.60245	0.66058	0.95283
48	0.65493	0.60917	0.65976	0.95411
48.12	0.65578	0.60465	0.65929	0.9543
48.24	0.65705	0.60761	0.65829	0.95663
48.36	0.65557	0.60744	0.66205	0.95383
48.48	0.65554	0.60678	0.66188	0.95408
48.6	0.65551	0.60544	0.6606	0.95466
48.72	0.65395	0.60671	0.66128	0.95374
48.84	0.65318	0.60498	0.66134	0.95263
48.96	0.65595	0.60548	0.65987	0.95467
49.08	0.65356	0.60336	0.65924	0.95354
49.2	0.65228	0.6067	0.66182	0.95216
49.32	0.65624	0.60274	0.66336	0.95376
49.44	0.6545	0.60447	0.65926	0.95388
49.56	0.65554	0.60462	0.6595	0.95468
49.68	0.65469	0.6049	0.66029	0.95563
49.8	0.65583	0.60606	0.66145	0.95451
49.92	0.6548	0.60603	0.65968	0.95407
50.04	0.65326	0.60636	0.66067	0.95235
50.16	0.65261	0.60494	0.65949	0.95294
50.28	0.65251	0.60309	0.66032	0.95241
50.4	0.65548	0.60236	0.66172	0.95341
50.52	0.65228	0.60386	0.65905	0.95537
50.64	0.65483	0.60389	0.65987	0.95089
50.76	0.65449	0.60468	0.65828	0.95492
50.88	0.65254	0.60691	0.66168	0.95112
51	0.65193	0.60517	0.65987	0.95356
51.12	0.65474	0.60362	0.65787	0.95389
51.24	0.65066	0.60321	0.65998	0.95327
51.36	0.65332	0.60575	0.6592	0.95789
51.48	0.65215	0.60264	0.65625	0.95143
51.6	0.65076	0.60426	0.65944	0.95421
51.72	0.6523	0.60378	0.66048	0.9495
51.84	0.65327	0.60184	0.66004	0.95657
51.96	0.65453	0.60414	0.65991	0.95562
52.08	0.65122	0.60516	0.65835	0.95269
52.2	0.65179	0.60429	0.66046	0.95375
52.32	0.64845	0.60287	0.65984	0.95112
52.44	0.65079	0.60242	0.6603	0.95447
52.56	0.65244	0.60501	0.65863	0.95242
52.68	0.65161	0.60227	0.65805	0.95229
52.8	0.6522	0.60273	0.65712	0.95193
52.92	0.65156	0.60022	0.65795	0.95252
53.04	0.65458	0.60298	0.65795	0.95102
53.16	0.65123	0.60095	0.65811	0.95306
53.28	0.65138	0.60259	0.65996	0.95456
53.4	0.65	0.60253	0.65921	0.95421
53.52	0.6524	0.60367	0.65852	0.95516
53.64	0.64958	0.60332	0.65877	0.95515
53.76	0.65162	0.60019	0.65697	0.95361
53.88	0.6511	0.60241	0.66032	0.95524
54	0.64903	0.60193	0.6587	0.95112
54.12	0.6505	0.60273	0.65945	0.95151
54.24	0.65148	0.60258	0.65966	0.95194
54.36	0.6522	0.60391	0.65857	0.95174
54.48	0.64941	0.60119	0.65892	0.95527
54.6	0.65128	0.60357	0.65779	0.95031
54.72	0.65195	0.60013	0.65922	0.95324
54.84	0.65053	0.60196	0.65895	0.94892
54.96	0.65201	0.6026	0.66076	0.95361
55.08	0.65178	0.59861	0.65696	0.95226
55.2	0.64953	0.60167	0.66007	0.95022
55.32	0.65015	0.60075	0.65909	0.95281
55.44	0.6518	0.60234	0.65837	0.95229
55.56	0.65172	0.6009	0.65752	0.95256
55.68	0.64829	0.60103	0.65721	0.95181
55.8	0.65049	0.60106	0.65809	0.95258
55.92	0.65119	0.60055	0.65702	0.95278
56.04	0.65011	0.60078	0.6559	0.9509
56.16	0.64977	0.60045	0.65801	0.94768
56.28	0.65048	0.60175	0.65698	0.95294
56.4	0.64761	0.60052	0.65729	0.9516
56.52	0.65131	0.60138	0.65653	0.94864
56.64	0.64851	0.60032	0.65452	0.95173
56.76	0.65079	0.59961	0.65654	0.94803
56.88	0.64836	0.60078	0.65779	0.9524
57	0.65096	0.60178	0.65845	0.95224
57.12	0.65138	0.59845	0.65853	0.95108
57.24	0.64966	0.59973	0.65699	0.94818
57.36	0.64982	0.59764	0.6568	0.95471
57.48	0.64918	0.60205	0.65784	0.95241
57.6	0.64928	0.59988	0.65715	0.95341
57.72	0.65168	0.59942	0.6569	0.94941
57.84	0.65277	0.59744	0.65741	0.95112
57.96	0.64917	0.60042	0.65887	0.95231
58.08	0.64971	0.59925	0.65499	0.95381
58.2	0.6485	0.60083	0.65761	0.94682
58.32	0.64983	0.60063	0.65856	0.94987
58.44	0.64949	0.59784	0.65574	0.94667
58.56	0.65146	0.60022	0.65423	0.95117
58.68	0.64808	0.60014	0.65554	0.94731
58.8	0.65074	0.60246	0.65606	0.95328
58.92	0.64911	0.59734	0.65296	0.95193
59.04	0.64825	0.59617	0.65581	0.94887
59.16	0.64959	0.59817	0.65637	0.94843
59.28	0.65096	0.59968	0.65717	0.9535
59.4	0.65118	0.5989	0.6561	0.9522
59.52	0.65252	0.59889	0.65467	0.95041
59.64	0.64926	0.59913	0.65777	0.95174
59.76	0.64992	0.59995	0.65633	0.94954
59.88	0.64944	0.59947	0.65561	0.95058
60	0.6474	0.60085	0.65769	0.95012
60.12	0.64743	0.59902	0.65564	0.95281
60.24	0.64744	0.59802	0.65592	0.94995
60.36	0.64942	0.59759	0.65599	0.95018
60.48	0.64764	0.59991	0.65657	0.95002
60.6	0.649	0.59701	0.65656	0.95122
60.72	0.64743	0.59744	0.65576	0.95307
60.84	0.64769	0.59549	0.65738	0.94758
60.96	0.64722	0.59796	0.65664	0.95055
61.08	0.64813	0.59941	0.65723	0.94848
61.2	0.64627	0.59668	0.6592	0.95425
61.32	0.64997	0.59936	0.65744	0.95003
61.44	0.6489	0.60024	0.65658	0.94834
61.56	0.6488	0.59859	0.65692	0.95152
61.68	0.64925	0.59609	0.65565	0.95173
61.8	0.64799	0.601	0.65723	0.9502
61.92	0.64979	0.59998	0.65606	0.95077
62.04	0.64885	0.60044	0.65438	0.94882
62.16	0.64674	0.59659	0.65496	0.94835
62.28	0.64983	0.60068	0.65419	0.94981
62.4	0.64594	0.59656	0.65644	0.95095
62.52	0.64703	0.59805	0.65676	0.95136
62.64	0.64871	0.59793	0.6555	0.95357
62.76	0.64592	0.59735	0.65715	0.95048
62.88	0.64952	0.5969	0.65592	0.94985
63	0.64536	0.59673	0.65882	0.95177
63.12	0.64709	0.59971	0.65213	0.94854
63.24	0.64782	0.5975	0.65706	0.94756
63.36	0.64459	0.59887	0.6557	0.95172
63.48	0.64722	0.59853	0.65621	0.94848
63.6	0.64593	0.59678	0.65636	0.94753
63.72	0.64659	0.59537	0.65553	0.95137
63.84	0.65067	0.59769	0.65639	0.95067
63.96	0.6475	0.59917	0.65564	0.94706
64.08	0.64776	0.59595	0.6558	0.95306
64.2	0.64768	0.59773	0.65389	0.9523
64.32	0.64559	0.59807	0.65619	0.95133
64.44	0.64489	0.59973	0.65731	0.95093
64.56	0.64447	0.59694	0.65397	0.95173
64.68	0.64781	0.59667	0.65502	0.94794
64.8	0.64789	0.59717	0.65736	0.94736
64.92	0.64739	0.59775	0.65272	0.95075
65.04	0.64815	0.5958	0.65347	0.9485
65.16	0.64904	0.59645	0.65429	0.95106
65.28	0.64443	0.59617	0.65586	0.95024
65.4	0.64757	0.59883	0.65592	0.95075
65.52	0.64739	0.5944	0.65552	0.9496
65.64	0.64466	0.59532	0.65544	0.95048
65.76	0.64586	0.59871	0.6563	0.94974
65.88	0.64598	0.59822	0.65349	0.94846
66	0.64854	0.59573	0.65496	0.94989
66.12	0.64503	0.59463	0.65286	0.94979
66.24	0.64648	0.59875	0.65569	0.95036
66.36	0.64438	0.5952	0.65599	0.95157
66.48	0.64756	0.59622	0.65482	0.94831
66.6	0.64563	0.59741	0.65648	0.949
66.72	0.64723	0.596	0.65535	0.95336
66.84	0.64623	0.59598	0.65698	0.94856
66.96	0.64873	0.59719	0.65375	0.94796
67.08	0.64809	0.59535	0.65547	0.94703
67.2	0.64683	0.59514	0.65514	0.9488
67.32	0.64415	0.59508	0.65871	0.95002
67.44	0.64585	0.59576	0.65491	0.95067
67.56	0.6463	0.59355	0.65418	0.95208
67.68	0.64649	0.59445	0.65664	0.94977
67.8	0.64533	0.59634	0.65577	0.94645
67.92	0.64362	0.59518	0.65528	0.94903
68.04	0.64504	0.59334	0.65491	0.94632
68.16	0.64211	0.5956	0.6565	0.94717
68.28	0.64508	0.59243	0.65591	0.951
68.4	0.64492	0.59809	0.65535	0.94993
68.52	0.64716	0.59623	0.65697	0.95037
68.64	0.64361	0.5956	0.65338	0.94801
68.76	0.64461	0.59395	0.65502	0.94744
68.88	0.64557	0.59672	0.65452	0.94958
69	0.64486	0.59795	0.6536	0.95284
69.12	0.64584	0.59596	0.65497	0.94897
69.24	0.6459	0.59507	0.65666	0.95173
69.36	0.64507	0.59569	0.65555	0.94936
69.48	0.64767	0.59649	0.65447	0.94735
69.6	0.64424	0.59719	0.65848	0.94839
69.72	0.6451	0.59336	0.65516	0.94914
69.84	0.64603	0.59475	0.65504	0.94973
69.96	0.6438	0.59509	0.65421	0.94704
70.08	0.64385	0.59306	0.65374	0.94853
70.2	0.64597	0.59326	0.65536	0.94782
70.32	0.64268	0.59249	0.65319	0.94711
70.44	0.64534	0.5938	0.65426	0.94938
70.56	0.64536	0.59198	0.65629	0.94868
70.68	0.64482	0.59418	0.65413	0.94856
70.8	0.64473	0.59432	0.65333	0.94825
70.92	0.64562	0.59551	0.65435	0.94553
71.04	0.64468	0.59302	0.65402	0.95103
71.16	0.64727	0.59446	0.65474	0.94879
71.28	0.64506	0.59536	0.65472	0.94672
71.4	0.64487	0.59318	0.65665	0.94875
71.52	0.64535	0.59327	0.6536	0.95026
71.64	0.64571	0.59595	0.65182	0.94947
71.76	0.64252	0.59421	0.65493	0.9457
71.88	0.64427	0.593	0.65548	0.94962
72	0.64568	0.59385	0.65378	0.95186
72.12	0.64285	0.59445	0.65427	0.94937
72.24	0.64451	0.59251	0.65308	0.94807
72.36	0.64336	0.59293	0.65248	0.95007
72.48	0.6436	0.59435	0.65488	0.94926
72.6	0.64429	0.59408	0.65435	0.94724
72.72	0.64219	0.59611	0.65629	0.94755
72.84	0.64511	0.59244	0.65439	0.95007
72.96	0.64371	0.59082	0.6568	0.94935
73.08	0.64199	0.59278	0.65309	0.95097
73.2	0.64231	0.59274	0.65517	0.94718
73.32	0.64272	0.59314	0.65399	0.94857
73.44	0.64335	0.59191	0.65223	0.94881
73.56	0.64352	0.5918	0.65234	0.9484
73.68	0.64609	0.59387	0.65338	0.9506
73.8	0.64505	0.59557	0.65422	0.94811
73.92	0.64413	0.59434	0.6557	0.94721
74.04	0.6414	0.59461	0.6535	0.94897
74.16	0.64363	0.59284	0.6536	0.94793
74.28	0.64446	0.59151	0.65308	0.9459
74.4	0.64308	0.59254	0.65567	0.95004
74.52	0.64415	0.59241	0.6566	0.94959
74.64	0.64663	0.59316	0.6527	0.94913
74.76	0.64328	0.59579	0.65303	0.94972
74.88	0.64322	0.59661	0.65484	0.94563
75	0.64164	0.59483	0.65197	0.94681
75.12	0.64553	0.59264	0.65558	0.94899
75.24	0.64548	0.59464	0.65274	0.94916
75.36	0.64275	0.59145	0.6561	0.95027
75.48	0.64555	0.5929	0.65405	0.94962
75.6	0.64251	0.59562	0.65461	0.94945
75.72	0.64157	0.59446	0.65373	0.94831
75.84	0.64127	0.59238	0.65531	0.94781
75.96	0.64229	0.5948	0.65346	0.94888
76.08	0.64055	0.59222	0.65361	0.94954
76.2	0.64277	0.59284	0.65292	0.94576
76.32	0.64285	0.59341	0.6541	0.94718
76.44	0.64322	0.58883	0.65279	0.94911
76.56	0.64403	0.59096	0.6532	0.94487
76.68	0.6421	0.59298	0.65513	0.94917
76.8	0.64261	0.59318	0.65354	0.95064
76.92	0.64248	0.59129	0.653	0.94865
77.04	0.63867	0.59003	0.65527	0.94742
77.16	0.64331	0.59533	0.65292	0.94829
77.28	0.64551	0.59398	0.65301	0.94582
77.4	0.64143	0.59153	0.65237	0.94527
77.52	0.64545	0.59349	0.6541	0.94766
77.64	0.64337	0.59233	0.65318	0.94546
77.76	0.64301	0.5928	0.65377	0.94731
77.88	0.64362	0.59363	0.65449	0.94814
78	0.64543	0.59309	0.65487	0.94584
78.12	0.64375	0.59253	0.6517	0.94909
78.24	0.64497	0.593	0.65058	0.94839
78.36	0.64458	0.59123	0.65513	0.9461
78.48	0.64271	0.5926	0.6526	0.94894
78.6	0.64538	0.59169	0.65256	0.95003
78.72	0.64248	0.59369	0.65288	0.95057
78.84	0.6428	0.59142	0.6524	0.94944
78.96	0.64137	0.59353	0.65086	0.94733
79.08	0.64332	0.59005	0.65279	0.94693
79.2	0.64205	0.5914	0.65468	0.94715
79.32	0.64163	0.5923	0.65265	0.94737
79.44	0.64312	0.58916	0.65533	0.94734
79.56	0.64031	0.59162	0.65194	0.95008
79.68	0.64261	0.59441	0.65605	0.94448
79.8	0.64215	0.59088	0.65325	0.94448
79.92	0.64229	0.59149	0.65306	0.95007
80.04	0.64193	0.59119	0.65393	0.94447
80.16	0.64324	0.59136	0.65309	0.94451
80.28	0.64011	0.59068	0.6526	0.94602
80.4	0.64267	0.59349	0.65305	0.94659
80.52	0.64135	0.59209	0.65257	0.947
80.64	0.64375	0.59066	0.65351	0.94405
80.76	0.64239	0.5926	0.65365	0.94691
80.88	0.6439	0.59124	0.65212	0.94714
81	0.64292	0.59081	0.64937	0.9501
81.12	0.64188	0.59234	0.65142	0.9483
81.24	0.6394	0.59235	0.65184	0.94536
81.36	0.64189	0.59144	0.65204	0.94299
81.48	0.64209	0.5897	0.65276	0.94614
81.6	0.64277	0.59099	0.65247	0.94622
81.72	0.64184	0.59165	0.65273	0.94555
81.84	0.64342	0.5892	0.65316	0.94409
81.96	0.64143	0.59088	0.65214	0.94347
82.08	0.64219	0.59318	0.65245	0.94837
82.2	0.63925	0.59247	0.65275	0.94652
82.32	0.64251	0.58747	0.65388	0.94987
82.44	0.64476	0.59249	0.65167	0.94515
82.56	0.64202	0.58859	0.65164	0.94622
82.68	0.64358	0.591	0.65042	0.9457
82.8	0.6417	0.59184	0.65494	0.95028
82.92	0.64271	0.59277	0.65125	0.94885
83.04	0.6422	0.5907	0.65433	0.94358
83.16	0.64332	0.59385	0.65263	0.94846
83.28	0.64457	0.5906	0.65187	0.94782
83.4	0.64129	0.59211	0.65058	0.94582
83.52	0.64328	0.58866	0.65337	0.94761
83.64	0.64103	0.58934	0.65254	0.94617
83.76	0.64293	0.59027	0.65121	0.94707
83.88	0.64097	0.58789	0.65354	0.94754
84	0.64036	0.59312	0.65144	0.94675
84.12	0.64275	0.58849	0.65242	0.94625
84.24	0.64255	0.59133	0.65129	0.94709
84.36	0.64268	0.59078	0.65466	0.94703
84.48	0.64	0.59172	0.65328	0.94988
84.6	0.64081	0.58978	0.65211	0.94787
84.72	0.6403	0.58974	0.65123	0.94328
84.84	0.64287	0.58991	0.65266	0.94868
84.96	0.64194	0.58851	0.65254	0.94557
85.08	0.64057	0.5889	0.6532	0.94624
85.2	0.64201	0.59106	0.65099	0.94674
85.32	0.64231	0.59072	0.65091	0.94627
85.44	0.64102	0.59057	0.65182	0.94706
85.56	0.64293	0.59167	0.65215	0.94603
85.68	0.64003	0.58903	0.65118	0.94211
85.8	0.6401	0.58949	0.65188	0.94828
85.92	0.64088	0.59103	0.65279	0.945
86.04	0.64013	0.59189	0.65102	0.94458
86.16	0.64363	0.5886	0.65347	0.94382
86.28	0.64097	0.59377	0.65074	0.94623
86.4	0.64046	0.59138	0.65047	0.94566
86.52	0.64053	0.59044	0.65166	0.94616
86.64	0.64047	0.59129	0.65124	0.9452
86.76	0.64077	0.59377	0.65326	0.94581
86.88	0.6426	0.59212	0.65045	0.94425
87	0.64206	0.58955	0.65222	0.9485
87.12	0.63889	0.59016	0.65209	0.9458
87.24	0.63992	0.58707	0.65057	0.94823
87.36	0.64071	0.58959	0.65244	0.94583
87.48	0.63996	0.58853	0.65083	0.94629
87.6	0.64081	0.5894	0.64972	0.9465
87.72	0.64235	0.59006	0.65161	0.94649
87.84	0.64131	0.59081	0.65308	0.94584
87.96	0.64141	0.59024	0.65408	0.94823
88.08	0.6409	0.59201	0.65397	0.94185
88.2	0.64188	0.59033	0.65129	0.94704
88.32	0.63994	0.58899	0.65235	0.94234
88.44	0.63863	0.58775	0.65149	0.94653
88.56	0.63788	0.58731	0.65079	0.9463
88.68	0.63972	0.58884	0.65296	0.95059
88.8	0.64052	0.58776	0.64953	0.94697
88.92	0.64082	0.58939	0.65003	0.94383
89.04	0.64122	0.58816	0.65101	0.94521
89.16	0.64092	0.59009	0.651	0.94805
89.28	0.64137	0.58984	0.65165	0.94486
89.4	0.63961	0.5888	0.65207	0.94728
89.52	0.64149	0.58761	0.65115	0.94875
89.64	0.6418	0.58799	0.65117	0.94797
89.76	0.64083	0.58966	0.65143	0.94437
89.88	0.64079	0.58875	0.65161	0.94508
90	0.64048	0.5896	0.65169	0.94889
90.12	0.64024	0.58888	0.65245	0.94681
90.24	0.63945	0.58622	0.65206	0.94531
90.36	0.63972	0.59148	0.65201	0.94481
90.48	0.64149	0.59027	0.65125	0.94604
90.6	0.64063	0.59066	0.65273	0.94517
90.72	0.63921	0.59144	0.65119	0.94847
90.84	0.64056	0.59088	0.65339	0.94647
90.96	0.63973	0.58738	0.6514	0.94996
91.08	0.64217	0.58843	0.65313	0.94642
91.2	0.63901	0.58886	0.6514	0.94714
91.32	0.64098	0.58661	0.65157	0.94603
91.44	0.63782	0.59037	0.65282	0.94561
91.56	0.63897	0.58952	0.65163	0.94828
91.68	0.63934	0.59118	0.65135	0.94324
91.8	0.64083	0.58958	0.65169	0.94686
91.92	0.64027	0.5907	0.65153	0.94934
92.04	0.6405	0.58835	0.65083	0.94472
92.16	0.64015	0.58833	0.65097	0.94437
92.28	0.64021	0.58965	0.65099	0.94728
92.4	0.63888	0.58936	0.64887	0.94643
92.52	0.64002	0.58951	0.65236	0.94536
92.64	0.63601	0.58794	0.65127	0.94899
92.76	0.64055	0.58997	0.65066	0.94611
92.88	0.63928	0.58882	0.6518	0.9427
93	0.6396	0.59235	0.65209	0.94365
93.12	0.64022	0.59004	0.65281	0.94474
93.24	0.6422	0.59012	0.64937	0.9438
93.36	0.64042	0.58767	0.65031	0.94468
93.48	0.64122	0.5884	0.65169	0.94716
93.6	0.64123	0.58911	0.65222	0.94496
93.72	0.64004	0.58744	0.64945	0.94767
93.84	0.64107	0.58968	0.64743	0.94346
93.96	0.63935	0.59034	0.65064	0.94613
94.08	0.63943	0.58838	0.65175	0.94723
94.2	0.6409	0.5905	0.65149	0.94815
94.32	0.64003	0.59048	0.6509	0.9475
94.44	0.63959	0.58915	0.65004	0.94872
94.56	0.63923	0.58747	0.65386	0.94608
94.68	0.63923	0.59013	0.65194	0.9444
94.8	0.63956	0.58872	0.6522	0.94363
94.92	0.64032	0.58825	0.65008	0.9493
95.04	0.64061	0.58739	0.65055	0.94175
95.16	0.63981	0.58752	0.65165	0.94608
95.28	0.63915	0.59078	0.65095	0.946
95.4	0.63844	0.58921	0.64979	0.94374
95.52	0.63966	0.58835	0.65062	0.94538
95.64	0.64165	0.58818	0.65131	0.94179
95.76	0.64182	0.59199	0.65124	0.9459
95.88	0.64049	0.59201	0.65226	0.9434
96	0.64115	0.58974	0.65071	0.94717
96.12	0.6425	0.59247	0.64837	0.94442
96.24	0.6403	0.589	0.64978	0.94422
96.36	0.64022	0.58859	0.65018	0.94383
96.48	0.63803	0.58739	0.65232	0.94689
96.6	0.64171	0.58915	0.65094	0.94474
96.72	0.64122	0.58794	0.65098	0.94834
96.84	0.64075	0.58939	0.64943	0.94393
96.96	0.63978	0.58773	0.6488	0.94371
97.08	0.63987	0.5901	0.65156	0.94243
97.2	0.64024	0.58753	0.65165	0.94746
97.32	0.63973	0.58937	0.65067	0.94566
97.44	0.64305	0.58754	0.6507	0.94275
97.56	0.63751	0.58707	0.65205	0.94339
97.68	0.64085	0.58647	0.65172	0.94413
97.8	0.64124	0.59008	0.6522	0.94553
97.92	0.63999	0.59011	0.6516	0.94295
98.04	0.64091	0.58868	0.65098	0.94269
98.16	0.63898	0.5896	0.65172	0.94469
98.28	0.63863	0.58758	0.65092	0.94465
98.4	0.64088	0.58857	0.65226	0.94703
98.52	0.63799	0.59101	0.65243	0.94523
98.64	0.63768	0.58827	0.65127	0.94706
98.76	0.64059	0.58724	0.65266	0.94561
98.88	0.64234	0.58664	0.64997	0.94366
99	0.63859	0.58829	0.64986	0.94752
99.12	0.63968	0.58633	0.65124	0.94337
99.24	0.63673	0.58758	0.65034	0.94668
99.36	0.63866	0.58777	0.65085	0.94706
99.48	0.63927	0.58736	0.65364	0.94417
99.6	0.63789	0.58778	0.65052	0.94317
99.72	0.63926	0.5868	0.65222	0.94472
99.84	0.63895	0.58619	0.64988	0.94729
99.96	0.63762	0.58561	0.65041	0.94273
100.08	0.64035	0.59133	0.65296	0.95004
100.2	0.64001	0.58876	0.65138	0.9457
100.32	0.63754	0.58833	0.65244	0.94651
100.44	0.63792	0.58607	0.65096	0.94368
100.56	0.63918	0.59149	0.65193	0.94585
100.68	0.64086	0.58822	0.64972	0.94592
100.8	0.6385	0.58864	0.65146	0.94386
100.92	0.6406	0.58866	0.65396	0.94499
101.04	0.63788	0.59052	0.65143	0.94667
101.16	0.6377	0.58929	0.64952	0.94426
101.28	0.63845	0.58963	0.65019	0.94224
101.4	0.63868	0.59007	0.65069	0.94547
101.52	0.63973	0.588	0.64904	0.946
101.64	0.63944	0.58848	0.65082	0.94361
101.76	0.63926	0.5865	0.64967	0.94098
101.88	0.64091	0.58779	0.65007	0.94185
102	0.64005	0.58747	0.6509	0.94632
102.12	0.63943	0.59022	0.64919	0.94456
102.24	0.64024	0.58675	0.65423	0.94592
102.36	0.63995	0.5874	0.65144	0.94392
102.48	0.63671	0.58917	0.65022	0.94792
102.6	0.63774	0.58663	0.65035	0.94459
102.72	0.63877	0.58745	0.65034	0.9445
102.84	0.63831	0.58749	0.65086	0.94692
102.96	0.63922	0.58759	0.64942	0.94529
103.08	0.63832	0.58931	0.65219	0.94647
103.2	0.6379	0.58818	0.64951	0.94415
103.32	0.63952	0.58675	0.65015	0.94726
103.44	0.64153	0.58992	0.64903	0.94599
103.56	0.63687	0.58876	0.65027	0.94391
103.68	0.63884	0.58784	0.64958	0.94275
103.8	0.63784	0.58806	0.64877	0.94574
103.92	0.64014	0.58603	0.65076	0.94101
104.04	0.63996	0.58845	0.64879	0.94633
104.16	0.63958	0.586	0.65015	0.94252
104.28	0.64009	0.58848	0.64811	0.94655
104.4	0.63623	0.58736	0.6501	0.94368
104.52	0.63817	0.59077	0.64915	0.9451
104.64	0.63812	0.58929	0.65106	0.94377
104.76	0.6388	0.59087	0.65253	0.94396
104.88	0.63765	0.58922	0.65097	0.94218
105	0.63649	0.58977	0.65133	0.94246
105.12	0.63669	0.58693	0.65118	0.94488
105.24	0.63915	0.58751	0.64875	0.94275
105.36	0.63817	0.58778	0.64991	0.9444
105.48	0.63801	0.58914	0.65203	0.93949
105.6	0.63835	0.5878	0.6498	0.94334
105.72	0.63604	0.58829	0.64794	0.94329
105.84	0.64078	0.58694	0.65011	0.94308
105.96	0.63921	0.58519	0.64923	0.9454
106.08	0.63748	0.58755	0.65218	0.94722
106.2	0.63973	0.58551	0.65278	0.94694
106.32	0.63962	0.58966	0.65147	0.94393
106.44	0.64006	0.58637	0.64866	0.94499
106.56	0.63843	0.58854	0.64916	0.94419
106.68	0.63777	0.58705	0.6492	0.94343
106.8	0.63677	0.58893	0.65276	0.94431
106.92	0.63482	0.58904	0.64905	0.94114
107.04	0.63829	0.58609	0.65242	0.94547
107.16	0.63584	0.58732	0.64779	0.9435
107.28	0.63767	0.58798	0.65115	0.94559
107.4	0.63747	0.58692	0.6491	0.94595
107.52	0.63758	0.58853	0.65059	0.94655
107.64	0.63669	0.5865	0.65151	0.9422
107.76	0.63709	0.58689	0.65101	0.9434
107.88	0.6365	0.58901	0.65006	0.94276
108	0.63668	0.58607	0.65202	0.94709
108.12	0.63741	0.58791	0.64962	0.94233
108.24	0.63664	0.58782	0.65234	0.94376
108.36	0.63647	0.5888	0.65005	0.94173
108.48	0.63726	0.58784	0.65079	0.94657
108.6	0.64004	0.58711	0.64921	0.94176
108.72	0.63622	0.5868	0.65105	0.94656
108.84	0.63701	0.58944	0.65137	0.94302
108.96	0.63576	0.58683	0.65196	0.94524
109.08	0.6375	0.58707	0.65137	0.94701
109.2	0.63948	0.58734	0.65102	0.94149
109.32	0.637	0.58847	0.64947	0.94199
109.44	0.64143	0.58744	0.65027	0.94601
109.56	0.63765	0.58834	0.65007	0.94438
109.68	0.63763	0.5908	0.65103	0.94692
109.8	0.63809	0.5884	0.65087	0.94363
109.92	0.63671	0.5864	0.65217	0.94251
110.04	0.63737	0.5875	0.64738	0.9458
110.16	0.63536	0.58707	0.65028	0.94436
110.28	0.637	0.58677	0.6493	0.94545
110.4	0.6399	0.58491	0.65093	0.94318
110.52	0.63574	0.58704	0.65052	0.94534
110.64	0.63775	0.58548	0.64933	0.94541
110.76	0.6385	0.58624	0.65085	0.94154
110.88	0.63687	0.58994	0.65174	0.94154
111	0.63603	0.5866	0.65021	0.94527
111.12	0.63628	0.58617	0.65278	0.94414
111.24	0.63913	0.58745	0.64966	0.94565
111.36	0.63674	0.58896	0.65112	0.94571
111.48	0.63724	0.58853	0.64983	0.94666
111.6	0.63806	0.58869	0.65072	0.94305
111.72	0.63753	0.58974	0.64932	0.94336
111.84	0.6366	0.58539	0.6512	0.94451
111.96	0.6384	0.58954	0.64879	0.94733
112.08	0.63387	0.58803	0.64799	0.94539
112.2	0.63474	0.58732	0.64862	0.94004
112.32	0.63721	0.58472	0.64784	0.94651
112.44	0.63781	0.5876	0.6498	0.94167
112.56	0.6363	0.58657	0.65068	0.94526
112.68	0.63863	0.58684	0.64997	0.94465
112.8	0.63585	0.58407	0.64874	0.94423
112.92	0.63906	0.5866	0.64991	0.94682
113.04	0.63721	0.58564	0.65152	0.94391
113.16	0.63909	0.589	0.64959	0.94339
113.28	0.63767	0.58969	0.65141	0.94036
113.4	0.63871	0.58862	0.65146	0.9425
113.52	0.6389	0.58781	0.65094	0.94409
113.64	0.63573	0.58946	0.64948	0.94203
113.76	0.6382	0.58782	0.65032	0.94395
113.88	0.6377	0.58631	0.64979	0.94399
114	0.63692	0.58716	0.65183	0.94271
114.12	0.63648	0.58511	0.65131	0.94171
114.24	0.63759	0.58648	0.64946	0.94695
114.36	0.63862	0.58776	0.65064	0.94733
114.48	0.6359	0.58503	0.65034	0.94506
114.6	0.63849	0.58792	0.65012	0.94345
114.72	0.63784	0.5862	0.65079	0.94487
114.84	0.63885	0.5883	0.65157	0.94475
114.96	0.63921	0.58583	0.64601	0.94432
115.08	0.63888	0.58736	0.65169	0.94312
115.2	0.63511	0.58736	0.65011	0.94096
115.32	0.63839	0.58687	0.64996	0.94129
115.44	0.63839	0.59015	0.64951	0.94129
115.56	0.63771	0.58789	0.65159	0.94306
115.68	0.63794	0.58517	0.65052	0.94343
115.8	0.63621	0.58887	0.64997	0.94145
115.92	0.63799	0.58855	0.64874	0.94192
116.04	0.63872	0.58769	0.65028	0.94694
116.16	0.63685	0.5869	0.64963	0.94705
116.28	0.63769	0.58688	0.64748	0.94483
116.4	0.63567	0.58516	0.64926	0.94259
116.52	0.63662	0.58306	0.64963	0.9444
116.64	0.63646	0.58787	0.65069	0.94427
116.76	0.63531	0.58677	0.65138	0.94477
116.88	0.6376	0.5873	0.64999	0.94466
117	0.63792	0.58574	0.65057	0.94214
117.12	0.63609	0.5861	0.65356	0.94299
117.24	0.63801	0.58912	0.65312	0.94219
117.36	0.63805	0.58552	0.64853	0.94571
117.48	0.63519	0.5855	0.65029	0.94285
117.6	0.6362	0.58724	0.65008	0.94348
117.72	0.63675	0.58325	0.65104	0.94323
117.84	0.63671	0.58623	0.64946	0.93848
117.96	0.63896	0.58594	0.65025	0.94174
118.08	0.63732	0.58589	0.64895	0.94535
118.2	0.6376	0.58669	0.65033	0.94243
118.32	0.63851	0.58482	0.65109	0.94232
118.44	0.63515	0.5853	0.65014	0.94163
118.56	0.63351	0.58804	0.64989	0.94364
118.68	0.63545	0.58755	0.64952	0.94497
118.8	0.63709	0.58542	0.65047	0.9478
118.92	0.63671	0.58824	0.64875	0.94141
119.04	0.63493	0.58627	0.65035	0.94222
119.16	0.63646	0.5883	0.65031	0.94321
119.28	0.63918	0.58372	0.65001	0.94348
119.4	0.63808	0.58406	0.64897	0.94188
119.52	0.63781	0.58755	0.65234	0.9418
119.64	0.63595	0.5839	0.64933	0.9409
119.76	0.63905	0.58537	0.64916	0.9426
119.88	0.63732	0.58911	0.64895	0.94031
120	0.63613	0.58485	0.64838	0.94103

## Sheet: Fig. 2e
[NAC] (nM)	RNC(ss) SRP-SR kobs (s-1)						mean	SD
0	0.19045	0.22809	0.1967				0.20508	0.0164694
37.5	0.1717	0.19072	0.22427	0.22824	0.20417		0.20382	0.0210617
75	0.21116	0.24661					0.228885	0.017725
150	0.19827	0.21506					0.206665	0.008395
300	0.14187	0.14897					0.14542	0.00355
600	0.094747	0.096945					0.095846	0.001099
[NAC] (nM)	RNC(ssmt) SRP-SR kobs (s-1)						mean	SD
0	0.14467	0.16161	0.17122	0.16115	0.15864		0.159458	0.00854626
37.5	0.13023	0.12217	0.11566	0.13448			0.125635	0.00726042
75	0.074852	0.074929	0.080569				0.0767833	0.00267706
150	0.024063	0.026809	0.013673				0.021515	0.00565732
300	0.012367	0.018362					0.0153645	0.0029975
600	0.0099362	0.0080444					0.0089903	0.0009459
[NAC] (nM)	RNC(ss) + NAC SRP-SR kobs (s-1)						mean	SD
0	0.18896	0.22712	0.16262				0.1929	0.03243
150	0.2402	0.18938	0.18583				0.205137	0.0304176
300	0.23296	0.27563					0.254295	0.0301722
600	0.23526	0.23583	0.20451				0.2252	0.0179203
[NAC] (nM)	RNC(ssmt) + NAC SRP-SR kobs (s-1)						mean	SD
0	0.14467	0.16161	0.17122	0.16115	0.15864		0.159458	0.00854626
150	0.11778	0.14176	0.13904	0.10029	0.12679		0.125132	0.0169104
300	0.1406	0.094039	0.092676	0.090109	0.12083		0.107651	0.0222294
600	0.082911	0.1232	0.077735	0.09076	0.11428		0.0977772	0.0199411

## Sheet: Fig. 2f
[SR] (nM)	RNC(ss) kon mean	RNC(ss) kon SD	RNC(ss) + NAC kon mean	RNC(ss) + NAC kon SD	RNC(ssmt) kon mean	RNC(ssmt) kon SD	RNC(ssmt) + NAC kon mean
25	0.11861	0.022129	0.032269	0.0054741	0.042169	0.0013765
50	0.16415	0.009487	0.040744	0.0015443	0.066271	0.0035302	0.0068
100	0.20342	0.0061037	0.054841	0.0048146	0.084914	0.0014246	0.0058327
200	0.2875	0.017632	0.10727	0.017556	0.14529	0.0078209
400			0.23464	0.04415			0.010596

## Sheet: Fig. 2g
	kon (M-1 s-1)						mean kon (M-1 s-1)
RNC(wt)	918700	585030	764240				755990
RNC(wt) + NAC	386190	409740	340690				378873
RNC(ss)	966000	1100600	829090	866810	1098900		972280
RNC(ss) + NAC	528040	540860	444200	516630			507432
RNC(ssmt)	512470	488170	571190				523943
RNC(ssmt) + NAC	7414	11967	18083				12488
RNC(ssmt2)	43525	39298	45907				42910
RNC(ssmt2) + NAC	4497.8	9217.5	6669.4				6794.9

## Sheet: Fig. 3b
wavelength (nm)	RNC BDP	RNC-BDP + SRP-TMR	RNC-BDP + SRP-TMR + unlabeled SRP	SRP-TMR
510	5.776	4.7348	5.9962	0.2202
511	6.2912	5.136	6.4042	0.113
512	6.7898	5.5224	6.8068	0.017
513	7.1376	5.8868	7.3202	0.1826
514	7.5064	6.1666	7.6138	0.1074
515	7.6626	6.2886	7.7208	0.0582
516	7.793	6.3364	7.8318	0.0388
517	7.7622	6.2812	7.7122	-0.05
518	7.559	6.1846	7.6634	0.1044
519	7.3988	6.093	7.3946	-0.0042
520	7.1574	5.9114	7.1268	-0.0306
521	6.7558	5.547	6.8792	0.1234
522	6.3834	5.345	6.4836	0.1002
523	6.0676	5.048	6.1574	0.0898
524	5.6844	4.7534	5.7346	0.0502
525	5.4038	4.4596	5.491	0.0872
526	5.0454	4.1672	5.115	0.0696
527	4.7288	3.96	4.7946	0.0658
528	4.4796	3.7052	4.5716	0.092
529	4.1638	3.5596	4.286	0.1222
530	3.9534	3.4044	4.0856	0.1322
531	3.7762	3.2236	3.925	0.1488
532	3.5972	3.0828	3.7696	0.1724
533	3.4708	2.9504	3.5518	0.081
534	3.3014	2.8262	3.4526	0.1512
535	3.1558	2.722	3.2872	0.1314
536	3.117	2.663	3.1564	0.0394
537	2.9722	2.5668	3.0772	0.105
538	2.8576	2.4494	2.9748	0.1172
539	2.7716	2.4566	2.934	0.1624
540	2.7122	2.372	2.886	0.1738
541	2.5708	2.3154	2.8022	0.2314
542	2.5228	2.2748	2.7758	0.253
543	2.4712	2.2864	2.7168	0.2456
544	2.3988	2.3038	2.6704	0.2716
545	2.3418	2.2542	2.6548	0.313
546	2.286	2.2618	2.6336	0.3476
547	2.2354	2.2704	2.636	0.4006
548	2.1654	2.2826	2.5992	0.4338
549	2.0668	2.2784	2.642	0.5752
550	2.017	2.3302	2.6634	0.6464
551	1.882	2.4516	2.7194	0.8374
552	1.9166	2.5188	2.8012	0.8846
553	1.801	2.6636	2.8664	1.0654
554	1.75	2.789	3.0112	1.2612
555	1.6904	3.0532	3.146	1.4556
556	1.6562	3.2358	3.37	1.7138
557	1.6056	3.524	3.6462	2.0406
558	1.5106	3.8958	3.8726	2.362
559	1.5066	4.2856	4.257	2.7504
560	1.451	4.6838	4.6892	3.2382
561	1.4254	5.2026	5.151	3.7256
562	1.3988	5.7784	5.5888	4.19
563	1.3594	6.3964	6.1132	4.7538
564	1.3466	7.1402	6.7372	5.3906
565	1.3334	7.7316	7.4108	6.0774
566	1.3076	8.4826	7.9132	6.6056
567	1.2908	9.2226	8.4894	7.1986
568	1.2944	9.8464	9.1056	7.8112
569	1.3088	10.4	9.7138	8.405
570	1.3086	11	10.2	8.8914
571	1.311	11.5	10.6	9.289
572	1.3084	11.9	11.1	9.7916
573	1.3518	12.4	11.2	9.8482
574	1.3672	12.6	11.6	10.233
575	1.4136	12.8	11.8	10.386
576	1.4698	12.8	11.8	10.33
577	1.4682	12.9	11.9	10.432
578	1.4816	12.9	11.7	10.218
579	1.5102	12.6	11.5	9.9898
580	1.5014	12.3	11.4	9.8986
581	1.501	12	11.1	9.599
582	1.444	11.7	10.7	9.256
583	1.4102	11.3	10.4	8.9898
584	1.4022	10.8	9.9942	8.592
585	1.3144	10.4	9.5202	8.2058
586	1.2488	9.8706	9.0858	7.837
587	1.1578	9.3624	8.6102	7.4524
588	1.0592	8.8652	8.1598	7.1006
589	0.973	8.3618	7.7472	6.7742
590	0.9016	7.9894	7.225	6.3234
591	0.821	7.4736	6.8696	6.0486
592	0.766	7.092	6.4522	5.6862
593	0.6684	6.6936	6.1136	5.4452
594	0.6344	6.4074	5.7776	5.1432
595	0.573	6.0606	5.559	4.986
596	0.547	5.7002	5.2368	4.6898
597	0.4892	5.4438	5.0118	4.5226
598	0.48	5.1878	4.7264	4.2464
599	0.4536	4.9906	4.5774	4.1238
600	0.455	4.7688	4.3882	3.9332

## Sheet: Fig. 3c_x0009__x0009__x0009__x0009__x0009__x0009__x0009__x0009__x0009_
[SRP] (nM)	RNC(ss) FRET		[SRP] (nM)	RNC(ssmt) FRET
28	0.33869		27	0.17622
14	0.36679		18	0.1835
7	0.33742		9	0.17182
3.5	0.32765		4.5	0.14128
1.75	0.28843		2.25	0.10927
0.875	0.25554		1.125	0.080247
0.4375	0.19283		0.5625	0.053249
0.21875	0.11365		0.28125	0.034366
0.10938	0.044624		0.14063	0.018815

[truncated: 39 more sheets: Fig. 3d, Fig. 3e, Fig. 3f, Fig. 4a, Fig. 4b, Fig. 4c, Fig. 4d, Fig. 4e, Fig. 4f, Fig. 6e, Fig. 7a, Fig. 7c, Fig. 7e, Fig. 7f, Fig. 7g, Fig. 7h, Fig. 7i, Fig. 7j, Fig. 7k, Fig.S1b …]
